# Supplementary material for: Codon Optimization of Insect Odorant Receptor Genes May Increase Their Stable Expression for Functional Characterization in HEK293 Cells
Source: Front Cell Neurosci. 2021 Sep 6;15:744401. doi: 10.3389/fncel.2021.744401 (PMC8450354; doi:10.3389/fncel.2021.744401)
Supplement: Supplementary file 3 [file Data_Sheet_1.XLSX]

## Sheet: Blad1
Supplementary Data 1. Raw data from HEK cell assays using wildtype (WT) or Homo sapiens codon optimized (HsCO) beetle odorant receptor (OR) or Orco genes
Receptor	Assay
ItypOrcoWT	Dose-response	Plate (biological replicate)	1	1	1	2	2	2	3	3	3	4	4	4	5	5	5	1	1	1	2	2	2	3	3	3	4	4	4	5	5	5
		Induction	No	No	No	No	No	No	No	No	No	No	No	No	No	No	No	Yes	Yes	Yes	Yes	Yes	Yes	Yes	Yes	Yes	Yes	Yes	Yes	Yes	Yes	Yes
Replicates 1-3 from Yuvaraj et al. (2021). BMC Biol. 19:16		Concentration (M) of VUAA1	Response (% ∆ fluorescence)
		0.00015	-1.24769	1.73846	1.89857	4.41932	2.27243	1.61637	0.614781	-0.0133413	0.264183	4.61052	6.66901	2.89135	4.45983	2.33095	3.09893	28.5732	21.9331	29.3749	27.7968	24.6723	30.7808	24.4901	24.992	25.0288	21.3237	18.9379	21.2462	14.9451	14.0165	13.5022
		7.5e-05	-2.21307	-0.10259	-0.73515	-0.2189	-1.54753	1.45104	1.08291	-1.14719	-0.064512	1.76727	3.60088	2.49683	2.73942	2.22499	1.20041	25.3877	26.1769	28.7116	26.8966	25.6535	26.3837	27.5775	24.4233	22.081	19.4385	21.2617	21.6673	13.8659	13.2247	11.1822
		3.75e-05	-1.27897	0.630212	-0.9165	-0.275	-1.20958	-1.10611	-0.331902	-1.50933	-0.44177	1.01659	3.16007	4.82438	2.38658	0.014269	3.89347	18.678	19.612	20.3444	24.3163	20.5795	25.082	23.4398	19.2064	14.5318	16.4707	14.3637	17.5583	10.7327	12.5413	12.8789
		1.88e-05	0.798226	0.937919	-0.6149	0.445324	-0.883643	0.0941738	0.462211	0.992164	-0.0508421	-1.19764	0.482284	2.07852	0.754365	3.58679	1.53366	5.08677	5.05849	4.9779	7.60015	21.2838	16.7992	7.43601	4.17689	3.40888	12.5612	13.0073	11.9102	5.6658	6.19451	6.91807
		9.38e-06	-2.44723	0.706625	0.365562	0.739599	2.46202	0.855501	2.29585	-0.959657	-1.42912	0.10292	3.69407	-0.73916	-0.65308	1.22761	1.94994	1.35243	-0.14722	2.02868	4.3872	5.5018	6.8075	-1.03348	2.99925	-1.1616	1.49859	3.20538	6.14154	2.73887	3.06318	2.18325
		4.69e-06	-1.11246	-0.19487	-0.522	0.823294	0.338233	-0.536606	1.50137	0.346784	-0.741341	-0.20408	0.758842	1.18366	1.73374	-0.23207	-0.2948	1.16776	1.25494	0.414527	-0.968113	-2.37621	0.243043	-0.241634	0.401167	-1.22762	-1.03402	2.09191	1.486	1.1591	0.274348	0.611096
		2.34e-06	0.33739	-3.09205	-0.60226	0.360063	0.231355	1.6003	0.479405	-1.79971	-0.581577	-0.91065	-0.94137	3.30839	1.53213	1.38647	2.26357	-0.80752	-0.56005	0.444966	0.516672	-1.67263	-0.882634	-3.00679	0.481737	0.838885	-0.80696	1.59298	-0.53562	-0.37943	0.84196	0.01371
		1.17e-06	-2.07543	0.744687	-0.26998	-0.595028	0.166508	-0.935557	1.15363	1.19495	-0.503407	0.012695	1.75495	-0.32987	5.12061	-2.20814	-0.35719	0.532958	0.736295	0.455217	-1.06069	-1.71195	-0.425532	-0.295038	-0.169143	-0.109237	2.61563	0.917314	1.59512	-0.65904	-0.13768	0.595822
		5.9e-07	-1.19271	0.17547	-0.0691	-0.855912	0.101492	1.25771	1.95456	-0.375292	0.613611	-0.16243	-0.49386	0.274147	-0.07559	1.52854	-2.35052	1.28485	-0.90655	-0.43422	0.276675	-0.777931	2.14498	0.0246579	-0.0122737	-0.757758	-0.04944	-0.46366	1.26034	0.60531	-0.03462	1.93584
		2.9e-07	-2.29796	-1.88917	-2.57635	-0.24517	-0.584478	0.00613723	-2.88598	0.608418	1.61875	-1.02914	3.51727	1.15603	-0.56532	1.85985	2.37696	-1.47041	0.421251	-0.07493	2.24169	1.02177	0.807078	-0.722804	0.121803	-0.660423	2.27173	3.15991	0.987097	1.42516	1.13565	2.48638
		1.46e-07	0.417929	-1.87184	-0.45062	0.334428	-0.744924	1.24349	-0.271003	-1.5915	1.32601	3.51602	-1.46977	-0.2453	2.12299	0.615789	0.45738	-0.41841	-0.29162	-0.54436	-0.347222	-0.58104	0.0243117	0.871861	-0.800147	-0.459784	1.06918	2.25996	2.45623	0.23948	-0.12547	0.895481
		7.32e-08	2.74773	1.45307	1.01841	4.85682	1.82187	-1.63506	0.451258	1.6127	0.313558	1.3756	1.643	3.9025	3.84561	2.24863	-0.23803	1.72031	0.50417	0.567586	0.107443	2.47254	1.57504	0.501424	-2.39136	-0.0431433	1.87916	0.296942	-0.19644	0.203095	0.908583	1.27576
Receptor	Assay
ItypOrcoHsCO	Dose-response	Plate (biological replicate)	1	1	1	2	2	2	3	3	3	4	4	4	5	5	5	6	6	6	1	1	1	2	2	2	3	3	3	4	4	4	5	5	5	6	6	6
		Induction	No	No	No	No	No	No	No	No	No	No	No	No	No	No	No	No	No	No	Yes	Yes	Yes	Yes	Yes	Yes	Yes	Yes	Yes	Yes	Yes	Yes	Yes	Yes	Yes	Yes	Yes	Yes
		Concentration (M) of VUAA1	Response (% ∆ fluorescence)
		0.00015	5.68505	3.29262	5.76695	4.29964	2.54893	5.70007	2.88399	5.82217	4.98259	7.8287	6.59036	4.1226	5.68695	6.76032	1.84162	3.15672	4.0852	1.95066	45.9832	39.0589	42.9022	30.7486	33.846	30.633	34.5937	32.3858	33.5191	36.8109	37.1207	35.184	39.8172	38.4826	33.8914	21.3164	19.3463	19.3877
		7.5e-05	5.85062	5.75366	3.86937	2.48603	3.16096	0.790457	3.54985	1.14117	3.11923	2.68628	4.01593	6.38431	3.08971	5.43143	2.01493	0.75799	3.49718	2.44741	41.6396	39.1902	41.1713	30.3598	31.8336	32.2926	36.4798	34.3351	31.1142	44.6238	44.2787	39.05	29.1512	36.6712	32.7656	19.3616	20.6978	21.4798
		3.75e-05	6.25204	5.40362	3.07675	3.29816	3.06049	3.17426	1.65232	3.67911	1.3579	1.94096	0.887251	-0.44976	0.10416	0.452629	0.962696	2.44035	0.020107	0.289777	37.9067	32.4941	35.6847	25.9398	28.8243	30.4112	25.8223	29.2437	26.0836	31.9189	34.5105	28.1913	26.3035	25.8019	24.4676	16.1662	16.6427	16.5632
		1.88e-05	2.04797	1.8143	3.4818	2.65168	4.99964	5.87016	2.30721	1.22236	4.77892	2.92343	1.91504	3.56849	2.2861	2.05354	-1.35168	0.352863	1.48862	-1.10059	16.4712	16.2181	20.8257	16.3381	13.9049	15.8746	17.3217	15.274	17.1784	17.038	19.0519	18.2958	16.1835	15.9832	13.476	9.89902	8.29887	10.4088
		9.38e-06	-0.03186	2.1492	1.6784	2.63702	7.85048	2.96467	-0.08816	2.47676	1.47238	3.36347	4.04427	0.146843	-2.00922	-0.86364	2.19212	-0.46661	-0.5421	1.80252	5.53954	6.33152	3.29001	6.16576	4.55773	5.58922	4.87506	2.94728	3.96531	6.41075	3.85945	6.09534	5.02333	1.98907	5.17282	3.47374	4.36112	-0.67783
		4.69e-06	1.44817	4.04105	0.561769	3.06617	2.87412	5.99432	-0.85402	0.673607	0.109178	1.33627	1.76513	-1.12683	-0.60998	-0.01199	-1.15899	-1.47059	1.01688	-0.37502	0.254189	4.33298	4.57535	-1.12199	2.74095	0.270345	-0.5874	-0.20549	2.05279	3.79912	1.40499	0.66654	-1.29395	0.796977	-1.29794	-1.46063	-0.37079	1.60683
		2.34e-06	3.51605	2.01911	4.20556	1.69942	4.76258	0.926951	1.66766	1.2236	1.4522	1.10718	-1.38086	0.655078	0.23545	1.49732	2.62509	-0.77712	0.945357	0.706436	2.5508	0.047264	2.30597	1.14483	-1.45783	0.626204	2.46607	1.56568	2.94958	2.32065	0.354117	1.76054	0.509409	0.680313	0.960285	-0.09929	0.991153	2.06242
		1.17e-06	2.19094	1.53623	1.31916	3.62016	3.43348	5.80996	0.085911	2.0293	0.26178	1.43041	0.296248	1.21913	1.55072	1.42964	0.285367	0.313626	0.345056	0.947181	2.6577	1.0209	1.60584	1.73815	0.818468	1.67081	1.66733	-0.24016	-0.49238	1.31629	0.313299	1.2293	0.297255	0.607722	0.340868	0.500989	1.8243	0.067645
		5.9e-07	1.43821	3.61152	2.04974	5.03719	0.174581	3.10863	0.466973	2.39696	2.2108	0.726331	0.019082	-1.27541	0.723066	3.44532	2.0451	-0.23645	0	0.198386	1.13073	-1.00599	1.78362	2.58804	2.43412	2.57017	2.19374	2.113	-0.83289	-0.46388	-0.52314	-0.06764	-0.59974	2.18412	1.97838	-0.51878	1.54664	-0.86486
		2.9e-07	2.35357	8.33286	4.51347	4.13894	1.0242	1.72294	-0.512	1.73403	4.13643	1.04798	-1.08027	0.214322	0.048966	1.8353	1.3084	1.15833	-1.04367	2.82123	0.475453	0.951288	-1.66796	-0.10232	1.12468	0.192228	1.83025	-0.25879	-0.46423	0.006138	-0.11349	-1.08567	0.356062	1.93132	-1.36233	1.96935	0.643302	0.993555
		1.46e-07	3.15812	2.34056	2.92947	1.93457	-0.29501	0.6844	0.133351	1.99657	1.78315	-0.43001	3.53463	-1.20205	0.21374	2.15113	1.42822	-0.93875	2.00027	1.74001	1.21438	0.037846	1.69285	2.28233	1.94099	2.12525	0.169423	-0.41611	1.16884	0.50889	1.04025	-1.27349	0.878948	0.171476	-0.53274	1.60994	2.39902	1.76889
		7.32e-08	1.34524	1.79007	1.73398	-0.19203	3.27381	3.03648	1.58513	2.92673	1.62397	0.953295	-0.00635	1.06812	2.03757	2.67693	-1.17861	1.54577	2.43266	0.454361	0.403917	3.21855	1.86817	2.0702	1.1194	1.50124	0.682053	2.84618	4.03186	2.02607	-1.07283	2.35843	0.397279	1.96964	1.88738	0.305914	0.398625	3.08417
Receptor	Assay
DponOrcoWT	Dose-response	Plate (biological replicate)	1	1	1	2	2	2	3	3	3	1	1	1	2	2	2	3	3	3
		Induction	No	No	No	No	No	No	No	No	No	Yes	Yes	Yes	Yes	Yes	Yes	Yes	Yes	Yes
		Concentration (M) of VUAA1	Response (% ∆ fluorescence)
		0.00015	-0.655773	-0.57626	-2.45941	0.555686	0.172168	-0.321314	2.63848	0.696723	0.26811	0.74631	-0.973461	0.011051	0.285901	-0.280357	1.86079	0.847458	-0.286208	-0.347432
		7.5e-05	-0.509247	0.0432666	1.0622	-0.529661	-0.391181	0.0530692	-0.262229	0.90864	-0.510054	-0.921877	-0.425853	-0.607753	0.165073	1.87992	-0.866934	-0.440572	1.63444	-1.18387
		3.75e-05	0.637776	-0.0428908	1.35914	-0.906292	1.85457	1.38783	0.50025	-1.3773	1.2129	0.689432	-1.36833	0.00530054	1.08121	0.316048	0.134802	-2.30543	-2.56787	-2.8289
		1.88e-05	-2.44241	-1.41062	0.625539	2.14866	2.96459	1.20099	-2.38572	0.631527	0.888056	-0.786302	-0.726945	-0.951261	-0.765159	0.110024	-1.44599	0.384578	0.319175	-0.880645
		9.38e-06	0.156469	0.198647	0.378726	2.72851	-2.17717	0.597925	1.56367	-0.248102	-0.735294	-0.289684	0.234292	-0.871691	0.457744	-2.23168	-0.829611	0.947468	-0.358673	1.9394
		4.69e-06	0.331055	0.2388	-0.607743	-1.35976	-1.20304	0.711254	0.121987	1.2337	-0.0346827	-0.282833	0.792258	-0.271305	1.06961	2.86994	0.275198	-0.850878	0.395238	0.804632
		2.34e-06	-0.488145	0.961745	-1.09097	2.36434	0.197789	-0.0847123	1.63798	2.48737	0.437871	-0.570244	-0.166894	0.35975	-0.524496	-0.228598	-1.00698	2.26757	0.735222	1.17218
		1.17e-06	1.17505	0.164929	0.235105	-1.08108	-0.381872	-0.747851	-0.0627565	1.26796	-0.108497	0.512956	1.58416	0.164069	0.8259	0.192004	-0.58661	2.17531	-0.598544	1.26912
		5.9e-07	1.80665	1.89453	0.684858	0.11409	1.52467	-0.744826	0.00487662	-0.69601	0.238735	0.857295	-1.26214	0.365486	-1.17107	0.602746	-0.216945	-1.87436	-0.325116	0.72865
		2.9e-07	0.868592	-1.15226	-1.12598	0.689655	0.832098	0.657187	0.872207	-1.88021	0.261324	-0.673542	-1.31868	-2.2416	-0.397715	1.34549	2.0524	-2.17176	0.681145	0.0786125
Receptor	Assay
DponOrcoHsCO	Dose-response	Plate (biological replicate)	1	1	1	2	2	2	3	3	3	1	1	1	2	2	2	3	3	3
		Induction	No	No	No	No	No	No	No	No	No	Yes	Yes	Yes	Yes	Yes	Yes	Yes	Yes	Yes
		Concentration (M) of VUAA1	Response (% ∆ fluorescence)
		0.00015	9.55977	2.81022	5.89709	4.8972	5.91779	3.94584	5.45761	6.72093	4.36424	5.04974	4.87696	5.70861	3.07165	3.27611	2.51958	1.98344	3.07813	5.08622
		7.5e-05	1.21704	4.89786	2.71832	4.43016	8.01748	2.29525	6.21586	6.98065	5.24846	0.880885	3.42213	3.5737	2.75279	1.30509	5.14734	1.68865	2.93024	1.9022
		3.75e-05	3.36339	4.1061	3.6968	5.40433	5.49051	7.35893	2.20825	2.75481	-0.05883	1.12594	0.924861	2.18818	1.91002	-0.11433	1.13123	0.961268	0.687247	2.81289
		1.88e-05	3.93651	6.23227	8.56858	8.77962	3.26026	0.983989	7.50789	6.11307	2.05432	1.8676	2.86666	0.565727	2.00994	1.2579	2.55805	0.258676	1.16712	2.28493
		9.38e-06	0.009491	6.76779	7.58834	2.88569	3.22379	3.53059	0.633453	2.28801	5.54964	3.35929	2.78002	2.00846	1.73178	0.808295	1.75117	0.525326	2.4404	1.56792
		4.69e-06	6.11859	4.157	3.4332	2.68802	4.17469	7.6863	6.05692	3.73827	4.7992	3.42803	1.59179	1.87833	1.24018	2.85602	0.976849	2.19543	0.356917	1.62368
		2.34e-06	7.36128	9.66291	9.84231	5.01591	4.67597	5.57852	6.26144	6.40967	4.98255	3.38416	3.0196	2.77067	-0.16125	1.16208	2.87996	1.53183	1.78067	2.18862
		1.17e-06	11.1862	6.92992	5.62794	7.70322	7.5302	5.46326	5.77045	4.93207	6.42653	2.95852	2.82741	2.42955	1.95434	3.40616	2.50083	0.569463	-0.67499	2.04792
		5.9e-07	2.72605	3.84936	5.9408	5.69064	1.93638	3.53369	4.20597	1.62147	7.49436	2.34884	2.76217	3.39821	3.02344	2.00964	1.04967	3.78372	2.37561	4.16475
		2.9e-07	9.81954	8.29582	2.29394	4.6583	2.22792	5.03642	4.74582	1.43412	3.01226	2.75296	4.22907	2.37032	4.29558	1.6722	4.60963	0.377315	0.682949	2.71761
		1.46e-07	5.33848	1.13648	3.88694	3.533	3.59899	2.92868	2.76657	0.689385	2.6379	4.24065	-0.15633	2.54255	0.901804	1.60102	-0.54963	4.04492	1.20377	3.61682
		7.32e-08	1.90491	4.80862	2.75866	4.02789	6.4585	4.83871	4.07504	3.2249	2.70736	0.201491	-2.08645	0.537416	3.31644	4.74969	0.814224	1.80937	5.18779	-0.57316
Receptor	Assay
ItypOR49WT	Dose-response	Plate (biological replicate)	1	1	1	2	2	2	3	3	3	4	4	4	1	1	1	2	2	2	3	3	3	4	4	4
		Induction	No	No	No	No	No	No	No	No	No	No	No	No	Yes	Yes	Yes	Yes	Yes	Yes	Yes	Yes	Yes	Yes	Yes	Yes
		Concentration (M) of (R)-(-)-ipsdienol	Response (% ∆ fluorescence)
		0.00015	0.169216	2.72489	3.62473	0.915787	1.23929	2.3101	5.95867	3.81284	3.68171	4.95362	2.84351	3.34859	7.97217	8.37898	6.8124	4.29062	4.84533	5.86783	7.52642	7.07976	5.57969	5.03693	4.82276	6.33143
		7.5e-05	1.63428	2.36702	0.457681	2.98992	-0.75269	-0.11941	4.9382	3.43811	-0.03064	3.79273	1.46143	0.220588	2.94006	3.15451	2.5867	1.64586	1.41303	6.94497	6.94897	4.37194	2.72193	4.68358	4.4938	5.52527
		3.75e-05	2.57732	0.451963	1.80157	0.948518	0.107854	0.880832	2.66732	1.08179	2.73329	2.37157	1.60699	0.997805	3.53954	3.65517	4.29637	3.648	3.0812	3.05353	3.50623	4.74936	1.65055	2.33041	4.1917	3.45984
		1.88e-05	2.583	1.80134	0.503588	4.79477	1.44909	1.78893	1.62321	-0.12297	4.83832	0.091045	3.248	1.45071	4.01171	2.02106	2.16851	-1.16592	4.55753	0.810313	5.28273	4.26711	2.36783	1.90744	2.81228	2.97853
		9.38e-06	-0.95667	0.100832	2.08573	-0.85491	1.26199	1.73101	1.06875	0.751179	2.14082	0.891095	0.854868	1.39888	2.7683	0.799257	1.25184	-0.16645	0.66568	0.640543	2.19209	2.65744	4.17624	4.3117	2.75794	2.59807
		4.69e-06	2.56758	-0.07399	2.63075	2.95154	3.49367	3.95879	1.00157	-1.77542	0.909354	1.12797	2.55007	2.79367	3.00298	1.12724	2.50732	1.70726	1.28965	1.72948	0.460777	0.487162	2.42887	-0.83455	1.54675	4.70313
		2.34e-06	-0.06696	1.54266	-1.69042	1.97205	0.768446	1.96078	-0.22256	-0.08595	2.24997	0.332529	3.53994	0.398355	0.526603	2.69872	0.523332	-2.54788	2.48503	2.09799	0.697531	1.66242	0.455107	0.359236	1.575	3.57593
		1.17e-06	4.00983	2.91081	0.482826	-0.81938	1.84928	0.953971	3.27803	2.84621	0.01679	3.5393	1.95601	-0.20673	0.19381	-0.10387	1.7698	1.60286	-0.4881	-1.87661	1.7186	2.71035	2.85568	1.05382	3.81973	0.537532
		5.9e-07	-0.68539	-0.29372	-0.71371	3.42042	-0.9299	-0.87277	3.57163	1.11953	-0.028	1.04127	0.974238	1.18103	2.24265	1.37079	-0.59383	0.243569	-2.16498	0.083453	4.04115	1.76507	0.82394	-0.11959	0.29173	1.04444
		2.9e-07	2.5885	-1.24308	0.074808	0.467982	1.17267	2.00024	1.14904	1.39809	4.40956	0.359758	3.99766	0.14011	-0.84059	0.912703	1.69523	0.166995	1.44653	0.645356	2.51639	3.85591	-0.81836	1.24309	0.589717	1.84652
		1.46e-07	2.01888	-1.46571	2.37561	1.01052	3.06643	1.05644	1.13404	0.50131	-1.46898	2.72593	2.07682	2.75808	-0.86369	0.429692	-1.00012	0.162488	1.78895	-0.44776	0.033269	-0.61595	2.82398	1.16524	0.232514	-0.69715
		7.32e-08	0.299663	1.51193	1.71084	-0.47364	1.67161	2.70826	0.839041	-0.59913	-0.96099	5.0472	1.44331	1.11836	0.207508	1.82392	1.77592	1.24163	1.69914	2.16116	0.790172	0.16327	0.793791	1.41669	0.087681	1.21592
Receptor	Assay
ItypOR49HsCO	Dose-response	Plate (biological replicate)	1	1	1	2	2	2	3	3	3	4	4	4	1	1	1	2	2	2	3	3	3	4	4	4
		Induction	No	No	No	No	No	No	No	No	No	No	No	No	Yes	Yes	Yes	Yes	Yes	Yes	Yes	Yes	Yes	Yes	Yes	Yes
		Concentration (M) of (R)-(-)-ipsdienol	Response (% ∆ fluorescence)
		0.00015	2.14724	1.15681	-0.50045	0.125962	2.66724	2.9514	4.72054	3.08272	4.16463	3.54657	1.13171	3.21913	12.0741	8.19361	13.6015	10.136	11.9802	8.13603	13.9779	14.1739	16.6364	13.1657	14.5526	8.9577
		7.5e-05	1.71909	1.36233	1.46014	0.475724	2.08986	0.228168	6.21486	2.19508	0.767357	1.1408	3.73904	1.39126	11.4271	12.1847	9.93801	9.47304	11.6888	8.79922	14.5398	17.5048	15.7721	13.8705	18.8294	16.0797
		3.75e-05	0.858264	1.77132	2.08227	2.05311	0.889839	2.53867	2.64636	8.96453	2.60056	4.41659	2.91754	7.21957	9.76955	9.46871	9.67722	8.25074	10.1026	9.25361	14.5837	12.7503	14.0398	15.9766	15.8246	13.7986
		1.88e-05	1.24163	1.22252	3.34073	2.2669	2.36515	5.44047	-0.60997	-0.11758	1.35952	0.881084	1.05237	1.678	8.63941	7.34501	8.74751	8.53233	10.3274	7.50902	9.91822	11.6761	9.49385	12.1121	12.3405	11.3824
		9.38e-06	1.05218	-0.22528	-1.37538	0.441167	2.49554	1.25529	0.696483	0.730439	1.36761	3.66887	1.09956	0.950061	6.50044	8.01864	9.06522	5.71391	5.91169	6.56604	11.6476	9.65529	9.48321	10.5924	8.34806	6.70026
		4.69e-06	0.392064	1.34444	0.193587	0.314548	0.407264	-0.13148	3.52186	1.27222	-0.95541	2.27055	5.37235	4.9994	5.55759	5.90661	5.24748	3.30035	3.64202	3.06991	6.0288	5.90452	7.81441	7.72604	5.56253	3.05895
		2.34e-06	1.29064	0.296516	-1.46354	-0.0521	0.491642	1.94982	2.93949	-1.26053	1.32201	0.498534	0.21398	0.554417	2.19652	1.54499	3.69784	2.36964	5.53815	3.79546	6.1087	6.16473	4.12887	3.97076	4.1389	4.18301
		1.17e-06	2.4157	-0.47788	0.174321	1.9613	3.56213	4.90447	1.99933	1.28212	2.8023	0.609331	0.772492	2.51305	1.4512	3.29938	2.40841	2.33331	4.81659	0.407305	2.10257	3.91316	1.30055	3.01107	5.56123	2.09446
		5.9e-07	3.82234	-0.92039	3.40288	0.774543	1.04505	1.816	1.09896	-2.7128	-0.5583	1.15583	2.0152	-0.50043	0.525902	0.968494	0.612195	0.606931	-0.93822	3.0047	2.74725	2.06824	0.512312	1.90806	2.21748	1.3765
		2.9e-07	-1.28397	3.34093	1.37556	1.33709	0.058487	-1.0398	2.85121	2.10823	-0.12112	0.332587	1.84904	-1.51063	-0.29734	1.8018	0.27869	2.57228	3.16422	1.50835	3.24222	1.61521	4.98951	1.6747	2.66628	3.53285
		1.46e-07	-0.04322	3.38983	-0.01829	-1.22972	3.6991	1.52895	-1.06289	1.05457	1.56373	-1.09355	1.46487	-0.75336	1.1611	0.662372	-1.83274	0.510336	-0.49359	-0.80244	0.042481	-0.16359	-0.62031	2.37351	1.27264	-0.09805
		7.32e-08	-0.75174	-2.0064	0.441872	-0.04715	-1.18105	-0.6458	-0.71007	3.05952	-0.11454	0.684043	1.75679	-1.55338	0.858555	0.285572	3.24363	0.987057	0.631271	0.724924	1.40814	0.879498	-0.07608	-0.59544	0.38897	0.916138
Receptor	Assay
ItypOR49HsCO	Screening	Plate (biological replicate)	1	1	1	2	2	2	3	3	3	1	1	1	2	2	2	3	3	3
		Induction	No	No	No	No	No	No	No	No	No	Yes	Yes	Yes	Yes	Yes	Yes	Yes	Yes	Yes
		Compound	Response (% ∆ fluorescence)
		VUAA1	4.55474	1.59639	2.23946	-0.19497	2.09137	3.15327	2.41421	2.11089	6.14635	19.7213	21.0229	18.0221	12.9992	14.4376	10.3518	13.5848	17.7765	12.2531
		E-myrcenol	4.96468	1.4295	2.80489	1.61499	1.08793	4.24906	1.37568	2.48039	-0.44846	2.09673	-0.29677	1.33029	0.547998	0.418551	1.02167	0.278533	-0.35681	1.4226
		Amitinol	1.98949	1.06668	-1.12817	0.740741	2.29234	0.70842	4.66436	-1.15221	-0.17483	2.17088	1.37704	-1.07384	1.74829	-0.29093	3.60142	1.47646	1.29743	1.24812
		(±)-Ipsenol	2.63066	3.60134	0.414495	0.520278	0.212235	1.53259	0.503218	0.651503	1.75896	3.08095	1.96792	3.45511	1.93204	1.61953	1.60623	3.90594	0.435791	2.48122
		Vehicle	3.21851	1.25775	-0.5792	1.72392	-0.40816	2.01142	-0.00612	0.14276	-0.39501	2.41241	1.85087	0.356189	2.17684	0.853749	-0.11849	-0.66132	0.19702	0.103049
		(±)-Ipsdienol	2.45255	-1.08614	1.47676	0.671141	2.50279	1.36715	2.20179	2.6737	1.58986	15.5481	14.9958	14.735	11.0948	11.4783	10.2754	10.6683	12.274	13.5743
Receptor	Assay
ItypOR23WT	Screening	Plate (biological replicate)	1	1	1	2	2	2	1	1	1	2	2	2
		Induction	No	No	No	No	No	No	Yes	Yes	Yes	Yes	Yes	Yes
		Compound	Response (% ∆ fluorescence)
		VUAA1	-2.60683	-2.81895	-1.62945	-1.52973	1.64365	1.05809	15.3821	15.0786	14.1409	26.8871	25.3683	14.5214
		(+)-Isopinocamphone	-0.382529	0.849997	-0.440406	0.356484	1.48466	1.3459	1.58764	-0.990576	-0.424377	1.36811	-0.415085	0.969315
		(−)-Isopinocamphone	1.55546	0.644938	-0.96434	-0.601531	-1.36347	0.360534	0.860983	-0.896296	1.33596	-0.692976	0.559457	2.03694
		(+)-Pinocamphone	-0.714	-0.087289	-1.20578	-0.209276	-3.27499	-0.414853	-0.290276	-2.09	-0.060819	-0.96573	0.742625	-1.51191
		(−)-Pinocamphone	-0.523595	-0.414911	-1.32219	-0.712884	2.00238	-1.60853	-1.46715	1.0679	-0.38967	0.677008	-0.391185	-0.773179
		(±)-Camphor	0.572546	0.939809	0.126139	0.625575	1.52793	0.272227	-0.469721	0.73508	1.10546	1.75283	-0.687923	-1.56672
		(+)-trans-4-Thujanol	-0.322851	1.09698	-0.860476	0.97561	1.72942	0.370755	-0.091539	1.9809	-2.08629	1.29244	0.488795	1.67586
		1,8-Cineole	-0.089721	2.20316	0.69655	1.01055	0.058729	1.22641	0.855856	-2.08425	-0.300109	-0.183554	1.41447	1.57756
		(−)-Verbenone	-2.4079	2.64719	0.365216	1.91621	1.34693	0.990357	-0.213046	-2.09677	-0.567691	-0.422792	0.412763	-0.174927
		(−)-(4S)-cis-Verbenol	1.04419	-0.850769	3.53805	0.026271	1.41534	-0.064952	2.34375	-0.775194	0.17226	1.64207	1.85122	0.987984
		(−)-trans-Verbenol	-1.69355	-1.72046	-2.61787	-0.84328	-0.632411	-2.22832	1.19476	-0.858974	-1.99987	1.56116	-0.914137	-0.072988
		(+)-trans-Verbenol	-0.509407	-0.893946	-1.18837	-0.102041	0.754848	-1.19997	-0.254663	-0.210402	-1.60975	-1.01435	0.944753	-0.95084
		Amitinol	1.06626	0.817128	-0.875701	0.573992	-1.08517	0.540432	-1.09458	0.642293	-1.04728	3.01604	-0.875576	-0.954124
		E-myrcenol	1.92852	-0.736492	-1.89063	-0.264031	1.23069	1.55466	0.574488	-0.643551	-1.25706	-0.319022	-0.30579	1.29747
		(±)-Ipsenol	-1.1336	-0.809565	1.99327	0.556059	0.415396	0.298391	-1.69124	0.457553	0.28664	1.55156	-2.63948	-1.70098
		(±)-Ipsdienol	0.287191	-0.553551	0.322316	2.12275	-0.291659	0.579918	-0.360782	0.747119	0.52547	0.208659	-0.443922	1.61587
		2-Methyl-3-buten-2-ol	0.484756	-0.151467	1.77507	0.329641	0.8994	-1.99652	0.457537	0.025195	1.16963	-0.792541	-0.950259	-1.43005
		Lanierone	-1.74146	0.506464	0.045944	0.909445	-1.57536	0.875131	0.49489	-0.455373	-0.058529	1.11311	0.582148	1.29836
		(5S,7S)-trans-Conophthorin	-1.6559	0.058774	0.412952	0.17258	2.46381	1.19765	1.296	-0.051894	-1.38962	1.08658	-1.23285	0.776645
		(+)-3-Carene	1.02256	0.607196	0.03952	-0.424929	-0.434197	-0.645208	0.658415	-0.670801	-1.23761	-1.97753	0.007449	-0.44964
		Myrcene	-0.508475	0.039257	-1.23217	-0.946586	-0.956727	0.066835	-1.66479	1.4147	0.02613	1.47671	-3.32494	1.29168
		(+)-α-Pinene	0.663924	-0.244961	0.035709	2.59151	-1.21815	1.4732	-0.7818	1.52721	-1.32902	1.25408	3.72433	1.85174
		γ-Terpinene	0.712773	-0.424821	1.30219	6.03552	0.126187	3.23362	-1.72549	1.63654	1.39358	-0.66596	0.402145	1.33591
		p-Cymene	0.266096	1.14831	-1.94737	1.51493	0.579581	0.648625	1.2213	-0.804117	-2.78722	-1.19316	-0.298986	0.156308
		Geranylacetone	0.880619	-0.69792	-0.85591	1.29699	2.73054	2.74991	-1.32184	-0.457862	0.461156	-0.62759	-0.985103	0.497845
		3,4-Dimethoxytoluene	0.9113	0.285297	0.241773	1.05326	-1.04407	-0.192406	-1.1039	2.04123	0.922373	0.045671	1.24935	0.521831
		Eugenol methyl ether	-0.197381	-1.48405	-1.38934	-0.531915	-0.397156	-0.32476	-0.046147	0.268553	-2.69291	-1.33063	-2.3154	0.174757
		Estragole	-0.14127	-1.85233	0.039221	-1.54201	1.05231	-2.81991	-1.58062	-0.311626	-3.43447	-1.66229	-0.611211	-1.55818
		4-Vinyl anisole	-0.19622	-1.22465	-1.0998	1.06099	-0.547046	-3.21605	-1.11609	-2.14236	-1.65842	0.096693	-1.2464	-0.417362
		4-Ethylguaiacol	1.77335	0.08441	2.16072	-2.43357	-2.14681	-1.86416	2.08144	-1.78835	-0.344156	1.60309	1.0449	-0.724866
		Acetophenone	-0.540398	1.08348	2.05975	0.846035	-0.88883	-0.811784	3.12283	0.802122	-0.989907	0.283725	1.54575	1.93608
		2-Phenylethanol	0.749443	-1.53305	-2.68296	-0.606852	-0.265232	-2.25131	1.16573	-1.24736	-1.11316	-0.953553	-1.02134	0.218769
		Styrene	-0.237215	-0.686672	2.53986	1.20438	1.88411	-0.955665	-3.21434	1.34238	-0.864918	0.200708	0.059021	0.455417
		(±)-1-Octen-3-ol	-0.445406	0.400052	0.044671	-1.53504	-0.013454	-1.40424	-0.586436	-3.60241	0.487429	0.377678	-1.25083	-0.353285
		(±)-3-Octanol	-2.63732	0.355826	0.044826	-1.71872	0.026422	-1.41887	0.813273	-0.635324	-1.87835	0.936546	0.196717	-1.63214
		1-Hexanol	0.88383	0.791189	1.94131	-1.39837	-0.053213	-1.14631	0.842351	-1.42447	-1.35245	-1.79085	0.311444	0.580155
		Vehicle	0.102867	0.138513	1.32072	-0.141781	-0.281523	-2.39832	2.30217	-0.888284	-1.14301	-2.45301	-0.527267	1.16455
Receptor	Assay
ItypOR23HsCO	Screening	Plate (biological replicate)	1	1	1	2	2	2	1	1	1	2	2	2
		Induction	No	No	No	No	No	No	Yes	Yes	Yes	Yes	Yes	Yes
		Compound	Response (% ∆ fluorescence)
		VUAA1	-0.13478	-0.70707	-0.50501	-1.87207	-0.69427	-0.76944	14.7992	12.9248	10.9123	13.0245	11.9722	8.74372
		(+)-Isopinocamphone	1.25926	3.14484	1.09281	0.910217	0.524153	0.419525	2.10823	2.17786	1.76731	0.965329	0.632558	2.70334
		(−)-Isopinocamphone	1.42219	0.790528	1.67838	0.667128	-0.38501	0.327689	1.11484	0.035771	0.303628	0.629404	0.618382	1.0781
		(+)-Pinocamphone	2.16321	1.51821	1.2546	2.05276	1.18419	1.20824	1.10206	1.91753	0.15445	1.53791	0.8499	2.06273
		(−)-Pinocamphone	2.64017	2.72801	1.89443	0.935984	0.619949	1.17729	1.29997	1.03098	2.10131	0.146754	0.971653	-0.23945
		(±)-Camphor	1.11041	2.28741	2.8633	1.16197	1.49494	1.6248	2.99679	1.39959	1.79461	0.738029	-0.14045	0.840713
		(+)-trans-4-Thujanol	1.536	0.940468	1.45616	1.07835	0.859238	1.04986	1.59457	2.95412	2.08642	0.715758	2.40168	2.16248
		1,8-Cineole	-1.14591	-0.91268	-0.9171	0.507243	0.915278	2.47884	0.090846	-0.44985	-0.95522	1.18894	-0.7956	-0.03293
		(−)-Verbenone	-0.28718	-0.42872	0.618747	-0.18189	-0.23946	0.340873	0.917841	-0.44701	0.717872	0.468328	-0.72531	-0.37528
		(−)-(4S)-cis-Verbenol	2.6077	3.0176	3.82885	1.91176	2.25887	2.05583	1.43232	3.18224	3.01324	1.78858	1.16993	1.9429
		(−)-trans-Verbenol	0.945974	1.35604	0.424351	1.4726	1.26075	1.70133	0.85867	0.782782	0.448503	1.20866	1.45967	0.852817
		(+)-trans-Verbenol	1.85444	1.38819	2.76917	2.3141	2.34389	2.26243	2.02109	2.48071	0.769243	1.31115	1.87197	3.13434
		Amitinol	1.0313	1.15584	0.391556	0.659416	1.06547	1.42766	2.171	1.92435	1.80133	2.42309	1.62705	2.23806
		E-myrcenol	0.723169	0.910981	0.263702	3.24476	2.61034	3.12319	-1.34356	-0.3983	0.075516	3.23963	2.71692	3.46894
		(±)-Ipsenol	0.225782	0.706262	0.442569	-0.25313	0.084492	0.724536	0.596503	0.133237	0.261602	0.826704	-0.20952	0.064293
		(±)-Ipsdienol	1.66544	0.30307	1.60407	1.45493	0.149196	1.26519	0.662274	0.50843	0.447175	-0.34011	0.905775	0.096087
		2-Methyl-3-buten-2-ol	0.736042	2.40468	0.070175	1.34954	2.26201	1.06098	1.21787	0.295983	0.372225	0.969381	0.530845	2.53624
		Lanierone	0.509911	2.62732	1.23941	2.24985	3.84862	2.37022	1.19531	0.710994	0.408183	2.0555	1.69688	0.605118
		(5S,7S)-trans-Conophthorin	1.55824	2.80101	1.8906	-0.23945	1.30003	2.32244	0.755421	1.30214	2.89165	1.49657	1.86171	0.482064
		(+)-3-Carene	2.02646	2.99647	1.84511	4.17073	3.21698	1.28923	2.55146	2.20621	2.03529	1.43943	2.15268	2.27868
		Myrcene	2.64217	2.36201	2.19233	0.547976	0.939147	0.757249	0.926388	2.12596	2.46894	1.37944	2.4817	1.32028
		(+)-α-Pinene	3.56541	2.80996	3.08394	1.26168	1.45156	1.04683	2.69075	2.39491	1.1559	2.1832	2.31775	1.35048
		γ-Terpinene	0.995468	1.68198	1.41441	1.36995	1.03264	0.027868	-0.03945	0.7432	1.89095	1.31668	0.628319	0.945069
		p-Cymene	0.134937	-0.88288	1.17707	0.882968	2.17649	2.88792	0.881876	-0.24906	0.203105	2.55637	2.75208	2.60806
		Geranylacetone	5.64181	4.44918	3.57913	4.51425	4.0998	2.36013	1.72972	2.80091	4.35137	2.68718	2.21765	2.10427
		3,4-Dimethoxytoluene	2.56222	2.36568	2.2988	1.33136	2.02782	0.766082	4.14612	5.16266	3.80571	2.21193	1.41542	-0.55639
		Eugenol methyl ether	1.12604	0.240817	-0.61086	0.702326	0.262416	-0.71049	0.281935	-0.7537	0.572333	0.049857	0.10141	0.445605
		Estragole	1.03027	0.812635	0.512869	1.56046	1.22471	0.12221	0.722528	0.885919	1.97989	-0.65019	1.03679	0.564943
		4-Vinyl anisole	0.928518	0.902067	0.639479	-0.07979	-0.88273	-0.24241	-0.86151	-0.08432	0.234245	0.724662	0.423374	0.109066
		4-Ethylguaiacol	2.17238	2.44095	0.901239	2.12242	1.88336	1.29852	1.4208	0.948529	0.045302	1.75018	2.02381	1.6829
		Acetophenone	2.2231	1.95504	1.22086	0.594235	1.62039	-0.24231	1.74452	2.73286	2.29325	-0.27561	1.23951	0.019567
		2-Phenylethanol	-0.31813	0.972252	0.221373	0.529721	0.131406	-1.27788	1.04392	0.768426	0.209882	-1.07438	-0.37305	-0.58191
		Styrene	0.684664	1.02421	1.49678	1.63788	0.418819	0.841672	0.8886	2.75631	1.52069	1.42288	1.92461	0.813363
		(±)-1-Octen-3-ol	-1.03613	0.560352	-0.22888	-0.23866	-0.29694	-0.96465	0.80608	-1.27001	-0.72381	-0.77221	0.298937	0.110831
		(±)-3-Octanol	-0.13845	-0.09752	0.261492	-0.23983	0.460618	-0.26339	0.645798	0.227961	0.384793	0.661573	0.428755	0.562314
		1-Hexanol	-0.04029	-1.09559	0.166815	0.739313	-0.03215	-1.19388	0.181388	-1.45595	-1.18462	0.206177	-1.05635	-0.87966
		Vehicle	-0.24173	-0.21057	0.021507	0.197306	-0.58752	0.416862	-1.37866	-0.03323	2.36706	-0.10852	-0.00555	1.34573
Receptor	Assay
ItypOR25WT	Screening	Plate (biological replicate)	1	1	1	2	2	2	1	1	1	2	2	2
		Induction	No	No	No	No	No	No	Yes	Yes	Yes	Yes	Yes	Yes
		Compound	Response (% ∆ fluorescence)
		VUAA1	0.064963	-0.632467	1.00777	2.02296	-2.27729	-0.44614	27.262	24.3819	19.23		25.9719	15.5815
		(+)-Isopinocamphone	-1.35281	-0.40107	-0.794989	0.506586	1.78641	-0.739626	-0.576969	-1.24436	-0.550334	1.57271	0.364642	0.349695
		(−)-Isopinocamphone	1.28814	1.3424	1.05602	1.0245	1.4419	1.29091	0.469595	1.23561	-0.502209	-1.19003	-1.95195	-0.784314
		(+)-Pinocamphone	0.310479	0.006495	1.82991	-1.98884	1.0465	0.206774	0.435093	1.85773	1.04559	2.48007	1.35423	0.711144
		(−)-Pinocamphone	0.389029	0.673855	-0.954669	-0.252616	2.95964	2.77778	-0.237164	1.9802	-1.15298	-1.12447	0.278055	2.31721
		(±)-Camphor	0.739626	-0.374742	0.139727	0.973082	-0.501028	-0.077866	0.48206	3.35665	0.006112	0.428334	0.063016	0.971922
		(+)-trans-4-Thujanol	-0.73391	-0.385581	-1.15149	2.07999	-2.00902	-1.0543	0.437246	-1.31243	-1.88252	0.566142	0.437697	1.02817
		1,8-Cineole	1.11151	1.20563	-0.196218	0.398703	-0.906667	-0.331372	-1.10415	-1.67636	0.943284	-2.88099	1.31978	1.55905
		(−)-Verbenone	-0.233407	-0.625475	1.85843	-0.024366	-0.234106	0.993621	-1.08134	-0.152036	-1.17455	-0.031064	0.834003	-1.08177
		(−)-(4S)-cis-Verbenol	3.55158	2.17824	0.917213	1.44336	0.423261	0.124891	1.65909	1.52	1.32125	0.304183	-0.593861	0.395679
		(−)-trans-Verbenol	-0.682795	-1.73988	-1.12584	0.874885	-1.4257	1.25446	-0.775821	-0.323647	0.718878	1.5888	0.517656	0.282752
		(+)-trans-Verbenol	-1.31118	-1.82172	0.550411	-0.444677	2.31788	0.040053	1.40622	-1.35178	0	1.01571	-0.342245	0.681408
		Amitinol	-2.03406	-1.44104	0.766172	-0.846219	0.686972	-1.1818	-0.348083	0.583264	-1.00147	-2.75396	-2.26579	-2.21663
		E-myrcenol	0.038317	-0.45542	-0.457811	0.663513	-0.718203	0.436966	-0.668662	-0.151191	-1.57006	0.310127	-0.334513	-0.217031
		(±)-Ipsenol	2.1786	0.311132	-1.12795	-0.952324	-0.60019	-1.93941	-0.608182	1.59148	2.37763	-1.24269	1.20243	-0.103791
		(±)-Ipsdienol	0.05891	-1.2537	-1.40715	-1.74247	1.06887	-0.978685	1.94285	-0.52951	0.646204	0.192726	-0.648636	0.889056
		2-Methyl-3-buten-2-ol	-2.50744	0.745655	-1.04887	-1.29202	-0.478093	-0.58536	-0.555816	-0.603539	0.068918	-0.061728	1.01772	0.8437
		Lanierone	0.331421	0.922275	2.13015	-0.286413	0.506944	1.06982	-0.352881	-0.933076	0.352655	1.56098	-1.4696	-1.61268
		(5S,7S)-trans-Conophthorin	-1.15902	0.474626	-0.288535	2.29621	-1.09883	-0.012559	0.276108	-1.51144	-0.87142	-2.07857	-1.53247	1.12551
		(+)-3-Carene	0.622673	1.95376	1.11972	-1.26427	1.56185	2.57318	0.436107	0.640297	0.236135	2.15927	-0.458967	1.59277
		Myrcene	0.831191	-0.373179	0.210279	0.804759	-0.564668	-2.13734	0.837175	-1.54449	-0.957854	-0.39428	0.054245	-0.388168
		(+)-α-Pinene	-0.969136	3.02374	2.70557	-0.075614	0.557421	3.84367	0.455245	-0.060259	1.39241	0.174871	2.30714	-0.558337
		γ-Terpinene	0.630702	-0.60869	-1.6131	-0.29668	0.208399	0.647934	0.267445	-0.536782	1.33912	0.58554	0.670755	-0.661788
		p-Cymene	1.10534	-1.38488	1.65079	-0.623948	-1.55862	1.43743	-0.932275	-1.37457	0.824075	-2.51791	0.013951	-0.632563
		Geranylacetone	1.24011	1.87596	1.1507	-0.210245	0.194601	-1.45329	1.32007	-0.999013	2.51395	1.64238	-1.62852	0.106831
		3,4-Dimethoxytoluene	1.10902	0.161812	2.37969	-1.03317	-0.81256	2.02252	1.09343	-0.371628	-0.167375	0.047788	-1.49009	0.493489
		Eugenol methyl ether	0.062391	-1.48608	1.05569	-0.69235	-0.013727	0.299798	-3.27554	-1.62383	-0.614883	0.053666	-0.962852	-0.344571
		Estragole	1.56773	-1.56458	-2.23073	0.155455	0.543554	-2.42089	-0.623726	-0.763544	-2.16164	-0.013759	-0.234412	-0.682274
		4-Vinyl anisole	-1.28007	1.10172	-0.959188	-1.86487	-0.439342	-1.55061	-0.819152	-3.29829	-0.698852	-0.714791	0.7607	0.688057
		4-Ethylguaiacol	-1.61812	-0.19263	0.537668	0.582415	0.120953	-1.14138	1.37533	-1.17561	1.05511	1.36815	-0.3981	0.354044
		Acetophenone	-0.038625	1.21208	-2.40543	1.74318	-1.88437	1.79581	-0.976077	-0.447542	-0.747174	0.578206	-2.00143	-0.83789
		2-Phenylethanol	1.6304	1.56481	-0.976326	-0.775194	-0.222297	0.274857	0.535441	0.722342	1.23737	0.055583	2.53253	-0.027341
		Styrene	-0.169779	-0.266584	-2.04305	0.271585	-0.828938	0.344081	0.460405	-0.685426	2.86825	1.73935	-0.935636	-0.708224
		(±)-1-Octen-3-ol	-1.94539	0.290065	-1.00763	-1.2692	-1.27353	-0.921659	-2.0665	-0.384638	2.39058	-2.26123	-0.87644	-0.074028
		(±)-3-Octanol	-1.63236	-0.785527	-0.70406	-0.111049	-0.982634	-0.857495	0.470182	-1.9972	-2.30992	-1.03711	-0.816098	-0.226632
		1-Hexanol	0.249195	-0.269393	-0.141226	-1.69302	-1.35303	-1.23419	0.78726	-1.17776	0.180636	0.132267	-0.880689	-0.430953
		Vehicle	-2.20172	-0.36272	3.35366	-1.65862	0.444576	1.89605	-1.18756	0.213931	0.182424	-0.515873	-1.01217	-1.90054
Receptor	Assay
ItypOR25HsCO	Screening	Plate (biological replicate)	1	1	1	2	2	2	3	3	3	1	1	1	2	2	2	3	3	3
		Induction	No	No	No	No	No	No	No	No	No	Yes	Yes	Yes	Yes	Yes	Yes	Yes	Yes	Yes
		Compound	Response (% ∆ fluorescence)
		VUAA1	0.155422	0.352624	-1.48097	-1.02164	-1.00595	-0.10868	2.15837	0.354392	1.72072	22.8259	21.3495	17.911	16.0641	13.6418	13.0216	17.2611	14.7326	17.7378
		(+)-Isopinocamphone	2.01085	1.47297	1.20353	0.345038	-0.2201	0.744688	0.234872	-0.83852	2.25482	-1.36124	-0.52971	-0.48478	-0.48723	-0.10468	1.92951	-0.52559	-1.60421	-1.09424
		(−)-Isopinocamphone	1.0757	-1.62903	-0.75597	2.03656	-3.05578	0.376294	0.26771	-0.22356	0.624871	-0.23713	-0.27427	1.7002	0.258983	0.142202	1.66059	-1.47912	0.166007	1.49657
		(+)-Pinocamphone	1.07751	-1.38031	-0.67147	1.35379	0.724004	-0.17956	-0.3815	-0.6299	-2.02489	0.238957	1.09245	2.13645	1.62005	-1.84824	-0.17079	0.013074	1.26731	-2.38268
		(−)-Pinocamphone	1.63764	-0.02175	-0.48144	0.092212	-0.24923	1.26938	-2.97875	1.54355	3.45131	-0.02751	0.794536	-3.02085	1.13779	0.208957	1.9043	1.39572	-0.3591	1.03011
		(±)-Camphor	-0.83856	-0.05158	-2.49203	-0.58659	-2.2404	0.091292	-1.03419	-0.54707	-1.00058	1.64766	0.858618	-0.72775	-1.70678	0.961014	2.3787	-0.8985	-2.31134	0.312739
		(+)-trans-4-Thujanol	1.03161	0.218052	-2.37393	-1.0425	0.5749	-0.05259	-1.75439	0.442508	1.03086	-0.74698	-2.69664	0.057449	0.713285	2.5421	-0.2229	0.006737	1.06005	-0.90571
		1,8-Cineole	0.309896	-0.41718	-0.09463	-0.75456	1.36276	-0.94456	-1.83003	-2.27664	0.622247	-0.24013	0.582842	-1.61161	1.07563	-1.44956	-0.2307	3.1427	0.144399	-3.51446
		(−)-Verbenone	-2.10364	-1.19387	-0.88952	0.773024	-2.20878	-0.72877	-0.51027	-1.20745	0.473581	1.0502	-1.87344	0.580705	-0.14253	1.54693	-0.0064	-0.54949	1.3096	-1.10051
		(−)-(4S)-cis-Verbenol	0.805711	1.32473	1.2272	0.921256	1.38532	1.73808	0.500755	2.89273	0.850446	-1.40365	1.7147	-1.36913	1.65896	1.45932	1.70432	0.820444	2.16486	1.25841
		(−)-trans-Verbenol	-1.80986	0.414487	1.41717	0.955843	0.907416	0.372638	0.626916	-0.99017	-3.27122	1.94031	-0.21226	-1.94413	1.86146	0.662603	2.1401	0.835227	0.372578	0.767965
		(+)-trans-Verbenol	0.13914	0.450546	0.581725	0.741171	-2.12213	-0.44685	0.953927	-0.03307	1.05729	1.86827	-0.01362	0.435686	2.25957	-0.42776	-0.01357	2.07	1.14574	1.00387
		Amitinol	-1.42857	1.57096	-0.16598	0.453092	1.15281	0.953651	3.0452	0.973716	1.878	1.99309	0.400894	-1.63468	-0.94437	0.324844	1.6993	-0.03938	0.817386	1.46449
		E-myrcenol	-0.38202	-0.80977	-0.63216	-2.11362	0.710519	1.09148	1.53016	1.46496	-1.52687	-0.49063	-0.1812	1.34306	-1.61394	-0.45576	-0.25227	-1.42049	-0.74209	-1.15923
		(±)-Ipsenol	0.714189	-0.18013	1.04167	-0.61753	1.83375	1.54691	-1.96376	-0.04774	0.317396	-0.69395	0.869451	-0.82988	-0.73231	0.247331	-0.85321	1.1725	1.69266	-0.58886
		(±)-Ipsdienol	0.666712	1.77487	0.168953	1.92006	1.66733	-0.88267	1.60834	-0.98727	0.892122	-0.8698	-0.23551	0.059032	-1.49735	-0.98525	1.26706	1.84854	0.085123	0.982084
		2-Methyl-3-buten-2-ol	-0.68924	2.08035	0.578664	0.888497	0.481058	1.8927	-1.70066	0.99162	-0.54885	1.28575	2.16068	0	0.993659	0.264901	0.802348	2.99906	0.827567	-0.23193
		Lanierone	-0.66298	-0.01407	0.997752	0.44428	-0.98148	-1.94578	1.40573	-1.16661	1.13745	0.177043	1.02097	1.63066	1.54051	1.01793	0.609713	-1.12148	0.838658	0.039063
		(5S,7S)-trans-Conophthorin	2.25973	-0.28135	-2.03957	0.986667	-0.01993	0.468259	0.711816	-0.09597	0.662562	0.533246	0.691617	1.54037	1.53012	-2.19222	-0.3709	0.533547	-0.80476	-0.8842
		(+)-3-Carene	1.49903	0.09362	1.39459	-1.0212	0.775246	1.99203	1.80079	0.559247	-0.35027	4.20146	4.19704	3.69542	5.65248	7.82012	6.0608	3.55567	3.60785	4.85113
		Myrcene	-0.38567	-0.42283	-1.43885	0.488003	0.579532	-0.67837	-0.34602	-0.26642	0.135656	2.10335	1.23143	1.9708	5.22867	1.86597	2.78221	4.2103	1.31699	-0.11809
		(+)-α-Pinene	0.395924	-1.20915	2.47722	-0.28286	-1.58161	-0.33434	0.076009	-1.39122	1.74033	-1.00978	0.615385	0.663943	1.85031	1.11546	2.63505	1.00113	1.28076	-0.55156
		γ-Terpinene	-0.69563	0.619603	-0.44485	0.659069	-0.56853	0.006854	0.871475	0.881883	-1.02797	3.31001	0.770591	-0.01275	0.842382	3.06864	1.41264	-0.53007	-0.84028	3.14016
		p-Cymene	-1.0093	-1.50994	-2.25826	0.06127	-0.46105	0.737315	1.27784	2.33744	-2.60313	1.05088	-1.26499	5.13926	-2.15026	0.260591	0.516283	0.727861	0.696286	2.75752
		Geranylacetone	0.889121	0.577306	0.80904	1.83425	0.533676	1.69446	1.92639	0.694203	1.498	1.62273	-0.31076	1.25049	3.06708	1.20363	-2.76866	-0.34249	2.66475	0.908737
		3,4-Dimethoxytoluene	-0.37746	-0.18994	-2.096	1.25879	-0.27064	-1.68156	0.183564	0.416461	1.22277	-0.85928	-1.79514	0.500033	-1.87085	-1.1337	1.71567	-0.66879	-0.04631	-0.46395
		Eugenol methyl ether	-1.46019	0.661471	1.17742	3.17915	-0.96721	-1.17214	-1.63819	-0.00698	-0.40034	0.824408	0.013011	-0.49793	-0.30899	-1.59127	-1.37552	0.363535	-0.17769	0.551978
		Estragole	-1.19816	0.02625	1.74179	-0.49585	-0.96109	-0.4562	-1.48791	-0.20947	0	1.01885	-1.82097	0.411184	-0.32703	2.5404	1.28256	3.91998	1.06852	1.22667
		4-Vinyl anisole	-1.28101	-0.31894	-0.68956	-0.98273	-2.07498	-0.53833	1.07091	-2.50148	-0.69065	-0.55166	-1.10114	3.08553	1.29103	-0.38902	0.419385	0.046044	0.659975	2.8393
		4-Ethylguaiacol	1.22921	1.45373	0.193773	0.714088	1.47259	-2.10336	-0.39479	-0.675	-0.52352	-1.03844	-0.30737	0.12966	0.056711	0.494714	1.15773	0.623549	-0.34986	0.47968
		Acetophenone	0.561101	-1.58647	-0.44359	0.020715	-0.77398	-1.34707	1.38584	-0.2477	-0.03539	-0.58617	-1.57365	-0.76826	0.019552	-0.82757	0.818231	1.00452	-0.07843	-2.46809
		2-Phenylethanol	0.464653	1.46892	-0.75638	1.62871	1.35383	-0.51116	-1.47719	-1.22292	-1.37332	2.34406	1.87739	-3.99873	0.694039	-0.74175	-1.94487	-0.64309	1.77446	2.3245
		Styrene	-1.00053	-0.47477	-0.46108	1.87854	-1.37566	0.532417	2.59519	3.29455	-0.37566	2.9427	0.448316	0.556528	3.14304	0.140863	4.48348	0.62448	3.34341	-1.02496
		(±)-1-Octen-3-ol	2.3842	0.68891	-3.36674	0.033152	0.244612	1.69322	-2.64932	0.525452	0.494882	-0.87198	0.071124	-1.49987	0.69808	0.462725	0.564754	-0.21632	0.921001	2.02027
		(±)-3-Octanol	-0.57143	-1.73861	0.054039	-2.96807	-1.31102	-1.88858	0.353774	0.678361	2.12396	-0.777	-2.12439	0.104712	0.653168	0.348386	-0.49812	-2.12849	2.54158	2.42654
		1-Hexanol	-0.73151	-1.71096	0.073275	-0.75662	-0.12811	0.915517	-0.2469	-0.37625	1.61213	-2.25912	-1.1315	-1.12696	0.27188	-0.25298	-1.44786	1.1307	1.13933	0.524264
		Vehicle	1.65165	-1.67514	-1.03656	-0.59371	-1.78177	1.18636	1.63426	-0.62232	-0.45192	0.805568	2.61326	0.542041	-0.23363	-0.17094	-0.72119	2.13893	1.0427	1.39429
Receptor	Assay
ItypOR25HsCO	Dose-response	Plate (biological replicate)	1	1	1	2	2	2	3	3	3	1	1	1	2	2	2	3	3	3
		Induction	No	No	No	No	No	No	No	No	No	Yes	Yes	Yes	Yes	Yes	Yes	Yes	Yes	Yes
		Concentration (M) of (+)-3-Carene	Response (% ∆ fluorescence)
		0.00015	-1.6784	1.16122	2.73135	2.0987	1.68127	2.23802	-0.0529	2.4495	1.85382	1.64071	6.04126	3.92183	5.36267	4.67225	2.32174	4.22498	5.06016	6.73986
		7.5e-05	-1.02027	0.074214	0.033402	0.272823	5.41537	1.04437	2.5313	2.02802	0.046305	3.21955	3.5728	3.21086	3.37934	3.38749	5.42964	4.95879	5.69383	3.322
		3.75e-05	-0.85163	0.184005	-0.74152	-1.82122	1.04694	0.110972	1.1502	-0.32945	2.12993	3.87331	2.28388	3.82957	3.36476	3.21964	2.8913	4.73318	2.60283	5.48325
		1.88e-05	0.70555	2.09305	0.512172	-0.16706	1.54188	1.39256	-0.25602	3.45153	0.013378	1.13102	3.50677	0.268542	2.90855	2.47272	-0.04756	0.202442	1.69988	2.18882
		9.38e-06	0.636605	-1.0558	-1.55579	0.882106	0.519823	-1.42405	1.28095	0.045612	-0.94718	1.9802	1.15372	1.74908	-0.08809	2.50208	-1.40575	1.73205	2.64508	2.74139
		4.69e-06	0.556725	-0.23966	-1.27793	-0.15406	0.076628	0.497169	-0.26674	0.451977	-1.03209	0.552486	-0.62128	2.22092	-1.40225	0.897322	-0.05345	2.87031	1.51348	0.039147
		2.34e-06	0.369251	-0.30958	-0.16077	-1.07616	0.143944	-1.94997	0.656944	0.09357	0.157812	1.14335	-0.5543	2.48379	0.737633	1.95655	-0.62632	0.111053	0.01964	-0.00667
		1.17e-06	1.82611	-1.02786	-0.79192	-1.17486	-0.26815	-1.08313	1.20134	-1.09279	0.114896	1.636	-0.31177	0.588951	0.55904	-0.8576	1.01262	0.193886	-0.69188	1.39718
		5.9e-07	-1.55065	-0.37418	1.314	0.530612	-1.90154	1.68768	0.91165	1.81905	1.49795	-0.19859	-0.57759	0.773872	-0.36991	-1.34282	-1.02055	-0.305	2.42718	0.796553
		2.9e-07	1.58215	-2.06411	1.2794	0.989003	-0.71637	1.55275	0.542387	-0.21648	0.899256	0.321206	-0.7504	-1.53441	0.540541	1.13784	0.277104	0.741616	0.032107	2.39481
		1.46e-07	0.893962	-0.44825	0.235026	-1.15825	-1.31752	0.783141	1.48781	1.65133	0.155091	-1.27546	-1.6641	1.29725	0.143325	-0.25087	1.06398	2.85525	-1.54443	-0.04699
Receptor	Assay
ItypOR27WT	Screening	Plate (biological replicate)	1	1	1	2	2	2	1	1	1	2	2	2
		Induction	No	No	No	No	No	No	Yes	Yes	Yes	Yes	Yes	Yes
		Compound	Response (% ∆ fluorescence)
		VUAA1	-0.280402	-0.979967	-0.27748	2.31566	-0.81859	-0.25225	36,436320000*	31.7848	34.4952	24.5242	23.0833	19.1614
		(+)-Isopinocamphone	-0.85623	0.190714	1.43694	0.48	0.10985	1.01724	1.18763	0.765907	1.83978	2.58621	2.10625	0.818402
		(−)-Isopinocamphone	-0.41299	2.033	0.875874	2.70848	-0.89464	1.47572	0.421667	1.5512	0.703354	-2.1205	1.07053	0.831025
		(+)-Pinocamphone	-0.2184	1.10307	-0.40642	2.4372	0.641697	0.833	1.68822	-0.33775	1.10279	-0.49515	-0.36886	1.2469
		(−)-Pinocamphone	0.401741	1.15764	4.69691	-0.31072	0.737502	2.74873	1.04362	0.500948	0.207233	0.311769	-2.51372	0.724307
		(±)-Camphor	5.65373	0.620421	0.62636	3.04422	1.33266	3.58358	1.66612	1.14137	1.36223	3.54153	-1.037	-0.61249
		(+)-trans-4-Thujanol	1.21607	1.24801	-1.98715	1.33871	0.84039	-1.01074	1.71891	3.77359	2.12365	0.587362	1.04763	1.16687
		1,8-Cineole	2.25457	2.01821	-1.66344	1.14168	-1.06023	3.71962	2.806	0.248349	1.09562	-1.36747	1.36241	0.48815
		(−)-Verbenone	1.57446	-0.276328	-1.68231	1.22796	-1.42047	-0.375738	-0.16001	2.45252	1.98888	-0.680874	1.68668	0.496497
		(−)-(4S)-cis-Verbenol	0.848336	0.822358	2.6222	1.27986	0.178645	0.687663	0.594781	1.74834	0.347881	-0.808737	1.07707	0.663362
		(−)-trans-Verbenol	1.99383	1.95315	-0.56787	-1.09275	0.494586	0.033521	1.38754	-0.097788	0.037216	-0.895522	1.21259	0.983146
		(+)-trans-Verbenol	0.462167	2.86581	1.65453	2.71864	1.63543	1.67651	-0.94969	1.56732	0.929193	1.1961	-0.18269	1.29953
		Amitinol	0.835351	-1.37566	1.88873	-1.59944	1.03922	-0.861445	-0.349946	0.706171	-0.242733	2.86851	-1.33138	1.57279
		E-myrcenol	0.171638	2.66998	1.51615	0.845513	1.17015	0.162221	0.514659	0.43106	-1.01201	0.24482	0.131312	-0.38708
		(±)-Ipsenol	-0.466738	2.69447	1.10541	0.656413	-0.377506	-1.84566	1.31088	1.65488	-1.11031	1.31057	1.57934	-1.9767
		(±)-Ipsdienol	-1.25076	0.797984	-0.611474	-0.399305	-2.14554	1.13561	-0.29618	0.24601	-0.133261	-1.58374	-0.957454	-1.13324
		2-Methyl-3-buten-2-ol	2.6982	0.712806	1.04276	-0.571501	-0.756596	-0.682092	-0.940292	0.370236	0.324417	3.22625	0.298244	-1.75231
		Lanierone	2.26678	2.29299	1.90102	3.05753	3.50797	0.945192	-0.8744	-0.08792	0.54163	-1.02735	1.34203	0.216024
		(5S,7S)-trans-Conophthorin	-2.19368	0	0.119859	1.2752	1.52698	-1.26876	0.348645	0.179644	1.06766	0.495153	-2.79285	0.656781
		(+)-3-Carene	8.22846	6.82969	9.52909	-0.51419	-1.55069	0.151865	6.41744	1.87216	-0.30443	-0.39606	1.59104	1.9626
		Myrcene	-0.67155	0.29174	2.14184	-1.90795	-0.1166	0.188287	0.926039	1.81157	0.826239	1.44323	0.92544	1.56003
		(+)-α-Pinene	6.23377	5.52522	4.52813	4.81257	6.15478	6.85568	5.83662	4.43642	3.79739	5.89929	1.86196	1.51308
		γ-Terpinene	1.97154	0.223728	1.95244	2.12353	2.16196	0.541213	-0.65296	2.1305	0.244404	1.09269	-0.69018	1.99105
		p-Cymene	2.15617	0.586457	2.91899	-1.04299	-0.30305	0.039316	-0.42447	0.243843	1.9752	1.04126	1.03448	-0.22275
		Geranylacetone	1.59299	0.454486	-0.52024	2.41945	3.40994	2.3427	0.424628	0.148416	1.34993	1.52334	1.66105	0.246711
		3,4-Dimethoxytoluene	-0.72561	0.249648	0.153886	3.58888	1.36767	1.26582	-1.34606	-0.40952	-1.31469	0.013367	1.08994	-0.0671
		Eugenol methyl ether	-1.35272	0.087929	2.02065	0.431881	2.14864	2.57016	0.992826	0.21093	2.87258	-0.04519	0.00653	-1.50142
		Estragole	2.07142	0.771775	0.795434	-0.80015	-0.89387	-2.85569	-2.15635	1.03793	-1.4111	-0.15352	-1.0653	-2.28074
		4-Vinyl anisole	0.944625	3.00316	-0.8293	-0.71557	0.290698	1.88222	0.852542	-1.92127	-1.32403	-1.49403	0.278586	1.60083
		4-Ethylguaiacol	0.23212	-0.74177	-1.99428	-0.39133	0.561019	3.01042	-0.28078	0.629683	-0.83969	-1.94479	1.30727	0.480061
		Acetophenone	2.93667	-1.44975	0.891569	-0.52934	0.562876	1.16024	0.395744	1.16747	-1.71365	-0.69702	-1.21561	-0.49119
		2-Phenylethanol	0.139878	1.04212	1.1707	1.8886	-2.22088	0.111924	-0.7542	0.348324	3.1417	0.58246	-0.53506	1.12533
		Styrene	4.0488	1.76501	0.138486	-0.02524	0.251083	1.26433	1.65554	1.61565	0.06985	2.09636	-0.20408	-2.35623
		(±)-1-Octen-3-ol	0.359449	-0.679897	-0.914188	0.543807	0.87511	-1.04292	0.569732	-0.570042	2.02995	-1.18912	1.70178	-1.31588
		(±)-3-Octanol	-0.236063	-0.300503	0.305306	-2.21125	-1.2807	-0.58651	0.054002	0.968777	0.360092	-1.7622	-1.05781	-1.58908
		1-Hexanol	2.16791	0.820265	1.16765	0.546237	1.2959	2.04985	0.201711	1.15286	1.30545	0.032688	2.4889	-0.23185
		Vehicle	-0.707731	0.437796	0.048789	-1.29182	1.14138	0.239266	0.37417	-1.93363	2.74648	0.258947	-2.63263	-1.20667
Receptor	Assay
ItypOR27HsCO	Screening	Plate (biological replicate)	1	1	1	2	2	2	1	1	1	2	2	2
		Induction	No	No	No	No	No	No	Yes	Yes	Yes	Yes	Yes	Yes
		Compound	Response (% ∆ fluorescence)
		VUAA1	-1.48304	1.14032	-1.02888	-1.21803	-0.39677	-0.33169	16.3087	14.5091	14.7471	15.5889	16.1508	12.7013
		(+)-Isopinocamphone	4.03111	-4.33688	-0.76912	0.168919	-0.46209	-2.10358	-0.92531	0.006662	-1.86163	1.85135	0.293529	-0.86412
		(−)-Isopinocamphone	0	-0.81014	-0.25126	1.38479	-2.12369	2.34419	0.696148	-0.82123	-1.7229	0.973054	1.74851	-0.78661
		(+)-Pinocamphone	-0.37283	-0.96716	1.39673	1.6374	0.997856	-1.75298	2.30912	-0.85911	0.837666	0.358835	2.29331	0.181884
		(−)-Pinocamphone	-0.08302	-0.74197	-0.55158	-0.85824	2.68552	-0.53676	2.08866	-0.37048	2.58897	1.20057	-0.63783	-0.88701
		(±)-Camphor	0.208348	1.01662	0.125087	1.43057	1.28519	-1.29617	-0.21909	0.621907	0.13766	1.41896	1.46671	1.18042
		(+)-trans-4-Thujanol	1.67626	-2.0792	-2.04666	0.869446	-0.52108	0.095792	-0.30338	1.5516	1.77738	0.843148	0.627361	0.323428
		1,8-Cineole	-0.17081	0.563003	0.12131	-0.37861	-0.22278	-0.89763	-0.78859	0.406044	-0.17616	0.078529	-1.17716	-0.60331
		(−)-Verbenone	-1.63641	-0.51085	-1.74163	-1.09139	0.21025	1.17789	-0.68072	1.6419	-1.02974	2.63055	-2.38289	0.762389
		(−)-(4S)-cis-Verbenol	1.08631	1.63421	2.28295	-0.87513	0.947772	1.95679	0.741518	0.893507	1.55492	1.55259	-0.3426	-1.81337
		(−)-trans-Verbenol	1.44637	0.559154	-0.23606	-1.66413	0.428506	-0.2753	1.27208	-0.95046	0.05925	0.740644	-1.21588	-1.52451
		(+)-trans-Verbenol	1.32475	0.812763	-0.76381	1.11714	2.04146	-1.58228	-0.95288	0.528092	3.49292	-0.55988	0.218643	-0.3412
		Amitinol	2.9816	2.04959	0.159766	2.14888	0.370959	-0.51383	0.95082	0.274205	-0.47576	0.871148	-0.35498	-0.81685
		E-myrcenol	0.370987	-0.64603	0.248888	2.22632	0.65407	-2.08082	-0.88458	-1.33875	-1.32998	-0.75316	-0.3181	-1.73428
		(±)-Ipsenol	0.647031	-0.63906	-1.35262	-0.64867	1.29448	0.23678	0.013144	-0.96191	-0.03215	-0.90379	-1.25096	-1.21313
		(±)-Ipsdienol	-0.76017	-0.19634	-2.37125	-1.02944	1.21784	-0.43943	1.98204	2.51417	0.513875	-0.26714	0.463559	0.191681
		2-Methyl-3-buten-2-ol	-1.80816	1.14379	0.543774	-1.18728	0.205705	-0.32481	1.31846	-1.76968	0.213537	0.857923	-0.03871	-0.16768
		Lanierone	-0.26758	0.036609	0.051584	-0.84801	0.015341	-0.06048	-2.34216	-1.18554	-0.1718	-0.76495	-1.56194	0.901892
		(5S,7S)-trans-Conophthorin	-0.87858	0.060245	1.11524	0.225914	0.582446	-2.19831	-0.06547	0.203934	-2.11747	-2.07713	1.50065	-0.12245
		(+)-3-Carene	1.79856	-0.68511	0.082976	0.453515	1.08894	-1.25744	-1.3342	0.761337	1.53995	0.558734	1.4411	-0.24828
		Myrcene	0.014292	2.1414	-0.47403	1.55198	-2.44726	-0.23348	0.267196	-2.5617	0.5308	2.17479	-0.10288	1.59939
		(+)-α-Pinene	-1.30592	-1.73943	0.021007	-1.29494	-1.45701	-0.19602	0.728535	2.13655	0.511302	0.709651	0.136444	1.71075
		γ-Terpinene	-0.60419	0.102152	2.30076	1.5052	0.882515	-0.26725	1.24817	-1.53906	0.731189	1.40175	0.079313	0.266631
		p-Cymene	-2.16442	-0.1434	-0.33424	2.03	1.92705	0.787086	1.32624	-0.8496	-0.94019	-0.8836	2.73121	-0.80791
		Geranylacetone	0.557222	0.659603	0.462765	1.75659	1.87638	3.36669	0.399946	-0.81704	1.44781	2.13634	1.2468	0.884485
		3,4-Dimethoxytoluene	-0.01438	2.2009	-2.26104	-0.05552	-1.31461	0.461216	-0.15142	0.245063	0.407966	1.73859	-2.54835	1.21329
		Eugenol methyl ether	-0.46135	2.18221	0.09315	-0.64985	-0.1672	0.020705	1.1139	-0.19412	-1.25251	0.363811	0.666152	0.354041
		Estragole	-0.40761	-0.46534	-1.0776	0.891746	2.16609	-0.65708	-0.90647	0.12905	0.73885	-0.03343	-1.61867	-0.30654
		4-Vinyl anisole	0.091254	0.859436	-1.70186	-1.1777	-1.78447	-2.13197	0.996678	1.83665	2.81032	-0.64599	-2.3323	-0.69501
		4-Ethylguaiacol	-0.55894	2.60049	-0.55492	-1.47371	0.00703	-0.78955	-0.44233	1.50912	-0.09771	0.60423	1.59611	-1.94143
		Acetophenone	1.29322	-0.99302	1.2877	0.117209	0.61467	0.970078	-0.59001	-0.80896	-0.68697	2.51453	1.83888	2.38848
		2-Phenylethanol	-0.88576	0.773584	-0.48839	0.883478	0.593078	-0.07648	-0.29732	-1.29958	-0.47677	0.951992	-0.55355	-0.66798
		Styrene	-1.57139	1.64691	0.76807	0.498124	0.268355	-0.05519	0.5249	1.83843	1.19001	-0.35838	0.329881	-0.90316
		(±)-1-Octen-3-ol	-0.22591	-2.242	1.19796	-1.80599	-1.3535	1.92372	0.25023	-0.47828	-2.26456	-1.21513	0.503564	-0.40005
		(±)-3-Octanol	0.402522	3.70571	0.634603	-1.32895	1.90765	-0.56555	-0.77357	1.29142	-1.99136	-0.86098	-0.9083	-1.04599
		1-Hexanol	1.49788	2.04637	-1.51978	1.43255	-2.55474	1.21455	-0.23675	0.091449	0.573701	-2.31601	-1.34792	-0.33335
		Vehicle	1.46535	0.302697	1.28729	-2.65789	-0.24842	-1.68616	1.59319	-0.76838	-1.17831	0.237248	-1.99867	-1.37076
Receptor	Assay
ItypOR28WT	Screening	Plate (biological replicate)	1	1	1	2	2	2	1	1	1	2	2	2
		Induction	No	No	No	No	No	No	Yes	Yes	Yes	Yes	Yes	Yes
		Compound	Response (% ∆ fluorescence)
		VUAA1	0.020299	0.382936	-0.54381	-1.05326	0.99661	1.67776	15.8687	15.9602	17.9322	23.0749	24.2573	22.2398
		(+)-Isopinocamphone	0.181771	-0.28532	0.643501	-0.94067	1.07306	0.07388	0.930774	-1.69004	-0.88597	1.11212	-0.41008	-0.96235
		(−)-Isopinocamphone	-1.59013	-1.0055	1.35782	1.70934	-0.98446	-1.83676	1.63178	1.43964	1.20955	1.47293	-0.86724	1.09733
		(+)-Pinocamphone	-0.2105	1.78994	-0.55821	4.19873	2.89013	0.821453	-1.02848	1.18004	1.37795	1.69981	-1.91854	-0.24984
		(−)-Pinocamphone	-0.17868	-0.27201	0.347336	1.44161	-0.57225	0.9284	1.61506	0.689746	-0.32791	1.60167	0.272321	-0.68317
		(±)-Camphor	-1.36211	1.04365	1.25913	1.07128	1.36856	-2.67992	0.485406	-1.10682	0.135153	1.57485	0.565864	-0.27792
		(+)-trans-4-Thujanol	-0.46445	1.06423	-0.58394	0.851933	0.466937	0.78887	0.201589	-0.07336	-0.93147	-0.96103	0.176726	-0.19037
		1,8-Cineole	-0.88075	0.244836	1.13387	2.8047	1.21074	-0.53476	0.378187	1.30352	-1.0879	-0.88981	0.28463	0.054293
		(−)-Verbenone	-1.36006	0.379929	0.374753	-0.23136	1.08287	1.08842	1.30379	3.58712	-0.0645	-0.01958	1.36769	2.33533
		(−)-(4S)-cis-Verbenol	1.69314	0.489972	1.41142	-0.3904	0.469361	-0.75217	0.617201	-1.10768	-1.16279	-2.4587	-1.40633	-0.44319
		(−)-trans-Verbenol	2.03479	-0.5856	2.42997	0.03904	-0.72913	-0.4278	-0.19286	0.181007	-0.70881	-2.48931	1.09926	0.456376
		(+)-trans-Verbenol	0.964326	0.941905	0.636288	1.43316	-1.67131	2.65173	-0.6392	0.271655	2.01368	-0.19442	-0.70741	1.93253
		Amitinol	-0.82387	-0.1452	-1.7408	0.256107	0.530434	1.24975	-1.03846	-0.57342	1.68185	-0.74724	2.81016	1.07187
		E-myrcenol	-1.35227	0.795756	0.226674	-0.96375	-0.83526	1.18613	-1.02825	0.146699	0.893966	1.51228	-1.08887	1.12748
		(±)-Ipsenol	-1.05841	2.26912	0.148272	0.246721	-1.99561	-1.09311	0.224734	0.236573	-1.17754	0.729024	-0.2653	-0.87731
		(±)-Ipsdienol	-1.2301	-0.00649	-0.71605	0.134745	-0.50669	-0.52621	-0.12872	0.715693	0.181418	-1.88229	1.32367	0.874959
		2-Methyl-3-buten-2-ol	1.3079	-0.67961	2.25959	-0.11736	-0.57128	0.408056	0.639757	-1.17203	-1.23433	-1.09217	-0.3526	0.860803
		Lanierone	-1.70337	2.01698	2.80143	1.11651	0.222484	0.222368	-1.64281	-0.89894	-1.17019	0.900783	2.16866	0.513018
		(5S,7S)-trans-Conophthorin	0.551594	1.26304	1.60827	1.4525	0.09698	-1.81868	3.90689	0.310805	-1.30972	-0.35264	-0.74433	1.2701
		(+)-3-Carene	5.93155	8.24599	2.53851	1.03569	2.74021	3.90933	0.465515	-1.7842	0.740421	1.17941	-0.10924	2.64766
		Myrcene	1.65163	0.499305	2.40795	2.55582	1.84216	1.44049	1.01657	0.204753	0.6743	-0.69381	1.40086	0.067926
		(+)-α-Pinene	-0.44928	0.714195	0.986541	0.783413	3.32167	-0.05466	0.348145	0.519464	-1.43655	1.90743	1.76447	-0.7331
		γ-Terpinene	1.2552	-1.42931	-1.19376	-0.69855	1.94507	0.226027	1.70436	0.832742	-1.56389	-0.75964	-0.9811	-0.89889
		p-Cymene	1.37257	-0.73671	0.18476	2.04319	-0.9555	1.98063	0.131678	-1.26511	0.057067	0.122666	-1.27308	-0.94558
		Geranylacetone	-0.08116	-0.35349	1.20396	-1.46138	1.91388	-0.02021	0.428589	-2.45568	0.307958	-1.92371	1.06419	-1.20894
		3,4-Dimethoxytoluene	0.157945	2.47695	-0.44609	0.760058	0.256208	2.91466	1.1396	-0.73811	-0.29252	-0.97306	2.58563	-1.30509
		Eugenol methyl ether	2.58056	1.2407	0.447678	0.223787	2.22179	2.58293	-2.10098	-0.22707	0.485869	-0.15021	-1.00496	0.981547
		Estragole	0.770001	1.35198	-0.69475	-0.47857	3.8243	-0.52191	1.15389	2.64544	-0.1283	0.827848	1.9558	-1.65074
		4-Vinyl anisole	0.1002	1.62445	0.135814	0.622187	-1.11857	0.435037	-0.38638	0.418967	-2.26737	-1.75394	0.663232	-0.87585
		4-Ethylguaiacol	1.39002	0.158646	1.24032	2.35271	0.706504	-1.36152	-1.03706	-0.17251	0.739079	0.345379	0.964232	-1.8295
		Acetophenone	-0.87685	0.459861	2.68867	-0.38711	2.65357	1.47473	-0.02762	0.785773	1.44327	-0.25132	-0.90446	-0.5255
		2-Phenylethanol	1.0558	-0.65114	-1.5692	1.24723	0.65391	0.062617	-0.86619	-0.21704	0.843705	-0.20147	-0.48257	0.729683
		Styrene	1.20233	-2.04772	-1.13695	-0.52751	-0.58228	-0.95055	0.994355	-1.28164	-1.03567	-1.29234	-2.11294	1.23361
		(±)-1-Octen-3-ol	1.44395	-0.57885	-2.25615	1.65658	-0.09468	-2.13595	-1.35385	-0.76551	-1.48388	-0.88956	-0.42208	-2.42273
		(±)-3-Octanol	1.57544	0.026142	1.81179	-0.23758	0.245616	-0.03425	0.308022	-0.24715	1.05019	0.176056	0.020239	-0.39878
		1-Hexanol	2.07921	0.532365	-0.56704	1.28115	1.77775	-0.55045	-0.0119	1.5109	-1.10782	2.37723	-2.24187	-0.86503
		Vehicle	-0.91943	0.95936	0.701944	-1.7848	0.533667	-1.04201	0.392953	-1.47144	1.56794	-1.77812	-1.78226	2.37659
Receptor	Assay
ItypOR28HsCO	Screening	Plate (biological replicate)	1	1	1	2	2	2	3	3	3	1	1	1	2	2	2	3	3	3
		Induction	No	No	No	No	No	No	No	No	No	Yes	Yes	Yes	Yes	Yes	Yes	Yes	Yes	Yes
		Compound	Response (% ∆ fluorescence)
		VUAA1	2.13134	-0.06724	1.22864	8.16263	2.12464	4.52913	3.58948	3.99766	2.42403	11.8426	8.75984	6.897	20.1422	22.5456	18.7561	33.9637	38.7383	40.2962
		(+)-Isopinocamphone	1.23841	2.6284	0.887747	17.4847	0.76526	2.01063	3.75232	1.18571	0.960204	-0.83573	1.55486	0.729373	1.16924	2.83456	3.44599	0.631058	-0.11811	1.00615
		(−)-Isopinocamphone	3.26921	1.26509	-0.14697	-1.98351	1.00364	-1.26681	4.55202	3.88162	2.62336	2.39223	1.06396	0.158006	-2.088	-1.80678	-2.17588	1.7681	0.56152	1.89478
		(+)-Pinocamphone	5.72153	9.59445	3.64963	-0.09133	1.41619	-0.52662	1.39162	0.927626	-0.33987	2.01338	3.04695	4.40511	-0.55943	0.75227	-0.86008	-0.97329	-0.66308	0.721268
		(−)-Pinocamphone	4.75104	2.40559	-1.08289	5.02006	0.602733	-0.12341	-1.52488	5.24326	1.53465	3.1561	-1.06654	0.306448	0.438397	0.45307	-0.8329	-0.7196	-1.30142	0.32112
		(±)-Camphor	4.1814	0.12959	1.67353	3.41904	6.8912	2.72892	13.3432	2.10459	0.646752	0.910305	0.317066	-0.1737	3.71245	-0.4911	-0.80766	8.92216	2.2566	-1.93405
		(+)-trans-4-Thujanol	0.226785	0.599913	1.68035	3.24557	4.42464	6.2356	4.73852	0.038642	1.57432	-0.38393	1.63894	2.08952	3.24138	2.68811	4.07112	7.7604	11.6969	1.64151
		1,8-Cineole	0.333611	-0.62167	0.387366	5.6511	1.90412	1.05292	2.39411	-0.35762	-1.06496	-0.69026	1.41608	-0.03006	-0.02757	5.19621	0.318429	-1.73685	-1.34653	-1.15351
		(−)-Verbenone	1.33105	0.621768	2.0917	-0.70008	-0.70777	0.283114	-0.22244	0.174375	-2.41192	0.587781	0.273141	-1.84409	-0.65107	-0.69063	-0.08004	-0.10612	-2.93177	-1.288
		(−)-(4S)-cis-Verbenol	0.519113	0.706861	1.1643	2.06572	3.62178	2.94436	3.80136	2.11779	2.7483	-0.53232	0.11798	-0.79778	1.17826	1.01466	2.69682	2.18654	3.6002	1.40181
		(−)-trans-Verbenol	0.963995	0.063463	-0.89119	0.410365	1.94343	2.87664	-1.31194	0.113125	-0.2144	0.430551	1.16525	-2.47909	2.42375	0.132259	-0.85984	2.6314	1.41178	0.039485
		(+)-trans-Verbenol	-1.2961	-0.42302	-1.90768	0.989509	1.07387	10.6393	0.229723	1.20603	1.11549	-3.3728	-0.53251	-1.12076	1.83826	0.683039	1.06971	-1.30912	-0.18865	-0.04272
		Amitinol	5.78944	1.96741	0.472841	1.00241	1.45869	0.353138	0.142377	3.17709	-0.98117	-0.33912	-0.10696	0.178625	-0.4459	-1.34665	-0.14149	-0.7358	-0.98294	-0.53079
		E-myrcenol	-0.53221	-1.05132	0.29397	-0.55883	0.189064	-0.29828	-1.32342	0.27387	0.251857	-2.28142	-2.81734	-1.53335	0.958855	-1.41753	-0.55099	-0.6108	-2.81943	-2.62767
		(±)-Ipsenol	1.05168	2.09909	1.59463	5.4861	1.94321	1.11831	-0.1877	15.6302	11.25	1.99283	0.384569	1.76864	-1.12274	0.307164	2.75619	5.52153	9.86571	6.31661
		(±)-Ipsdienol	2.49039	2.38462	-0.22203	5.70067	2.352	1.78311	11.1046	1.83231	4.51208	2.28139	-0.13739	0.382328	-0.43551	0.483059	-0.43362	-0.61585	-0.62223	-1.8665
		2-Methyl-3-buten-2-ol	-0.94568	0.554661	-1.26612	0.589198	1.31788	0.261862	0.307783	0.947629	-2.06341	1.68523	-1.03505	-1.10102	-0.53834	0.062613	0.338571	-0.91896	-1.68361	0.799792
		Lanierone	-1.57159	0.667338	-0.31231	1.64684	0.646259	0.604928	4.80396	1.60433	7.82224	2.79756	0.239551	1.50659	-0.64216	-1.00808	-0.46341	1.80235	0.062974	0.533063
		(5S,7S)-trans-Conophthorin	4.64907	2.11743	0.126338	2.83909	0.560748	1.41268	-0.05027	4.79526	3.80193	2.04993	-0.03904	2.43125	0.598771	1.00421	0.213895	0.182637	-1.78138	-0.84693
		(+)-3-Carene	8.97926	11.0337	8.88036	6.56639	4.51863	14.9369	6.00626	3.92455		5.75575	1.01393	0.031012	0.460693	-0.04629	0.09193	0.49169	-0.22318	6.90645
		Myrcene	2.4859	2.31991	1.00847	1.22097	0.364078	0.38916	2.32393	1.32787	18.1369	-0.8463	0.95432	1.33542	0.693204	-0.53093	2.28697	-0.7968	3.27826	-0.58053
		(+)-α-Pinene	6.19791	7.25608	7.04076		8.46976	11.3089	12.1532	11.1112		5.92044	5.3429	2.4331	-0.23263	1.54673	2.77985	-0.43518	0.077024	6.4778
		γ-Terpinene	2.47038	3.82491	4.77259	1.69315	2.51169	5.20582	1.13314	2.22517	-0.95772	-0.42573	-0.69057	4.53991	-1.8725	-1.20531	-1.24826	2.25417	-1.93342	-1.22339
		p-Cymene	2.0478	2.95824	3.4614	2.77503	0.812402	3.7211	-0.49103	11.0092	-0.12672	0.186332	2.65685	1.36279	1.50387	0.337982	3.07117	0.734046	-0.96755	4.99131
		Geranylacetone	4.37547	4.33685	2.23902	15.4373	7.74234	10.7773		5.3828	8.63414	2.83569	1.93361	-0.37255	2.68732	3.19078	5.76576	1.11095	0.886778	1.43444
		3,4-Dimethoxytoluene	-0.0064	0.384591	1.08289	-1.96839	0.53149	0.019813	4.0814	2.81707	3.2881	-0.0319	1.84596	2.53827	-1.83945	0.216585	-1.77195	2.5419	2.08672	2.56089
		Eugenol methyl ether	2.03252	-2.49647	-0.76944	-1.55434	-2.43756	-1.16171	-1.7475	2.96194	-1.14967	1.1445	1.12795	-0.4189	-2.79461	-3.38291	-2.14511	-3.01553	-2.76493	-2.70372
		Estragole	3.17968	1.19407	-1.21573	-2.27903	1.02945	-0.91812	1.72533	1.91947	2.06865	-0.0895	2.29663	0.746614	-1.62969	-0.31603	-0.42939	1.39026	2.26503	2.58764
		4-Vinyl anisole	1.72944	0.963245	0.844904	-2.17212	-1.778	-2.452	-3.09357	-2.48377	-1.21113	1.50663	0.024963	1.31563	-4.13358	-3.77612	-4.02309	-2.32146	-2.0063	0.00807
		4-Ethylguaiacol	0.109093	1.77615	1.78274	-2.46026	-1.7667	-1.89039	2.60277	1.37731	3.02302	1.07607	2.22511	-0.24068	-2.81175	-2.74461	-2.70365	0.160004	3.38384	4.19766
		Acetophenone	2.28594	1.22892	3.04786	-0.37153	-1.52795	-1.69313	1.11694	-0.82295	-0.37198	2.39059	1.91865	2.1371	-1.09285	-1.91256	-1.22806	0.227589	-2.12174	-2.22695
		2-Phenylethanol	2.7883	-0.47757	-0.05477	1.30257	1.00699	1.37585	0.250039	2.53079	6.3417	1.8628	-0.36171	2.05986	-0.84595	0.029229	-1.45668	0.34181	0.41227	-0.3879
		Styrene	0.272787	0.450557	0.555166	-2.95947	-2.29474	-2.34848	-1.63064	-1.04613	-0.88371	1.05356	0.719724	1.16597	2.49798	-3.74171	-2.53531	-0.66254	-1.2465	-2.02405
		(±)-1-Octen-3-ol	-0.5147	2.55172	1.95034	-0.55029	-2.17307	-0.55741	-1.05574	-2.24578	-1.85284	-0.26696	-0.83682	0.465591	-3.51609	-3.55346	-0.06131	-0.70182	-3.22668	-2.19337
		(±)-3-Octanol	3.92451	-1.02526	1.70156	-0.56187	-0.19769	3.73765	-0.23995	-0.7271	-0.64134	0.870755	1.80597	-0.8625	-1.1808	2.18445	-0.24801	1.67486	6.7194	-0.99202
		1-Hexanol	1.19498	-2.05249	-1.96044	-1.06551	1.04627	2.34845	1.31481	1.03959	1.61915	0	2.69226	-0.83167	-0.55167	-1.2303	0.770446	-1.97915	-1.22375	-2.69978
		Vehicle	2.50508	1.14442	2.11295	-0.77746	4.76508	0.875123	-0.46434	1.02913	-0.45601	1.46656	-1.39214	1.81106	-0.13548	-0.53131	0.814183	-3.10386	-2.02368	-1.66082
Receptor	Assay
ItypOR29WT	Screening	Plate (biological replicate)	1	1	1	2	2	2	1	1	1	2	2	2
		Induction	No	No	No	No	No	No	Yes	Yes	Yes	Yes	Yes	Yes
		Compound	Response (% ∆ fluorescence)
		VUAA1	1.33841	2.09734	-0.834655	1.47272	0.818545	0.584145	32.9474	37.6933	31.2221	17.8723	16.7392	14.7462
		(+)-Isopinocamphone	1.83628	-0.495704	-0.800688	0.627953	0.143242	-3.09913	-1.49088	-0.170559	2.28921	-1.5362	0.028425	-0.531702
		(−)-Isopinocamphone	-0.067866	-1.38255	0.052977	-1.66535	-4.42569	-0.177987	-2.66667	0.96135	-0.703226	1.55056	-1.14739	-0.53653
		(+)-Pinocamphone	-2.02246	-0.01333	1.43618	0.006596	-2.66249	0.944091	-2.17823	-1.30236	-1.07094	-0.216326	-0.777219	-0.531743
		(−)-Pinocamphone	1.58382	-1.0324	0.59655	1.4243	0.40819	-1.13947	-2.83031	-0.894169	-1.48039	0.043449	-1.39812	1.07198
		(−)-Pinocarvone	-1.00788	-1.14498	-0.659356	-1.86196	0.449875	-1.54566	-2.01905	-0.156484	-2.74167	0.518072	-0.570817	2.37325
		(±)-Camphor	0.572714	-0.463288	1.05331	0.628931	0.393701	-0.320095	0.893527	0.851298	-1.66814	-0.185119	0.947056	0.659833
		(+)-trans-4-Thujanol	-0.032541	1.46395	-0.784739	-1.66876	-0.766017	0.878187	-0.51984	-0.762165	1.52991	1.57535	-0.92991	0.782537
		1,8-Cineole	-1.06879	0.382843	-0.431089	0.405805	-0.027254	1.34173	-3.46089	-0.25113	-0.928465	1.25085	-0.121474	0.380491
		(−)-Verbenone	-0.275588	-0.530367	-0.201664	-0.115473	-0.090259	-0.25895	-0.978281	0.974827	-3.32869	0.75956	0.55168	-0.063424
		(−)-(4S)-cis-Verbenol	0.144563	0.00633	2.18205	2.55795	-0.070256	-0.058328	1.14068	0.249563	0.97645	1.31452	2.68676	0.889519
		(−)-trans-Verbenol	0.555987	0.126534	-1.17188	1.13344	1.8813	0.135187	0.349563	0.20274	0.186858	-0.006424	-0.30264	-0.724405
		(+)-trans-Verbenol	2.02679	-0.787078	0.540618	-0.02249	-0.282139	0.117388	-1.82858	-0.516556	-0.275193	-2.00296	-0.755139	-1.05631
		Amitinol	-0.084366	-1.56319	-0.282341	1.4264	-0.468262	0.774469	-1.11417	-0.983771	-1.0742	1.25807	-2.74968	0.980898
		E-myrcenol	0.006854	-0.908663	1.00396	1.03093	0.458453	-0.797283	-3.14596	-0.721785	1.21546	-2.50803	-1.42953	-0.693883
		(±)-Ipsenol	-1.81423	-0.97586	-1.90554	2.48903	-0.750906	-2.18017	0.827438	-1.82897	0.16305	-0.457858	-0.675241	2.75585
		(±)-Ipsdienol	-1.43439	1.17118	-0.928104	1.23569	0.006424	1.26185	0.490044	-0.168025	0.51084	-1.78719	0.998208	-2.3579
		2-Methyl-3-buten-2-ol	-2.65417	-3.09786	-0.748417	0.748592	-1.00526	-0.434811	0.842412	-0.329274	-0.379897	0.045511	0.070735	-3.30162
		Lanierone	1.72752	-0.297036	2.46266	-1.21403	1.82994	2.96068	-2.76565	1.07058	0.294815	0.241444	0.468835	-3.00915
		(5S,7S)-trans-Conophthorin	1.1668	0.451389	-0.769394	0.451076	-1.64509	1.9975	-1.17536	-1.06319	-2.42627	-0.573372	0.503676	-0.64667
		(+)-3-Carene	1.34682	-0.30327	1.2513	-1.00482	0.435577	0.973426	-0.432708	1.2052	0.419626	0.405973	-0.068795	2.51267
		Myrcene	1.64012	3.04511	-0.531217	0.194688	2.1736	1.96092	-0.238332	-0.32113	-0.736094	2.13206	-0.378997	-1.85978
		(+)-α-Pinene	0.573888	2.09904	0.409533				-0.47101	-0.294947	-2.26232
		γ-Terpinene	-0.446306	-0.331279	0.878759	3.54293	1.94353	5.02859	-0.033693	-1.61344	-0.048074	1.27818	-3.69678	0.347611
		p-Cymene	-0.759162	-2.32255	0.228579	-1.65975	0.090466	0.997592	0.502999	-1.90255	-0.608935	0.877944	0.090309	-0.950201
		Geranylacetone	1.43608	2.11755	-2.84143	1.40862	0.370135	2.42085	0.053305	1.77831	0.05291	0.102453	-2.10079	-0.464738
		3,4-Dimethoxytoluene	0.109805	-1.31002	-0.663703	0	0.194981	2.68983	-0.243247	-1.85338	-1.23386	0.47503	1.91993	0.388131
		Eugenol methyl ether	-0.20995	0.355619	-1.79443	1.33836	0.442257	-2.1565	2.43871	-1.27365	-1.49569	0.771843	-0.429923	-0.508659
		Estragole	-1.14988	0.0129	-2.16436	-0.338028	0.262976	-0.408969	0.299001	1.71618	-0.070626	-0.403984	0.013912	-1.38413
		4-Vinyl anisole	-0.606687	-0.128883	1.14846	-0.341686	0.321604	1.48992	-1.16221	-1.96752	-1.61666	0.634825	-2.21929	-1.85049
		4-Ethylguaiacol	-2.29306	-1.40096	0.172723	1.05447	0.624382	1.53342	-2.62044	0.832812	-1.07876	-1.30611	0.266193	-1.13977
		Acetophenone	1.46454	-2.42267	-1.53661	1.34309	-0.367991	0.252032	-0.043438	-0.304424	-1.40775	1.64244	0.806052	-2.24288
		2-Phenylethanol	1.48302	0.229947	-1.69604	-1.76985	-0.105828	1.46713	-1.16587	0.690388	0.94702	-0.239874	0.529474	1.75839
		Styrene	-0.773024	-0.348806	-0.12715	-0.145054	2.14361	0.047187	-1.21772	-0.426202	2.03644	0.510966	0.091256	-1.75891
		(±)-1-Octen-3-ol	-0.006932	0.923266	-0.748198	0.255085	-0.504913	-0.114117	0.093383	-3.56935	-1.59017	-1.82513	-1.39055	-0.013408
		(±)-3-Octanol	-0.113107	-1.13515	-0.601189	-0.147039	0.686406	0.584329	-1.47292	-1.91409	-1.00432	-0.951216	0.648148	-1.86335
		1-Hexanol	-2.04162	-0.490456	-0.718644	-0.882648	1.80879	0.10008	1.10591	0.893326	0.479233	2.18194	-1.44134	-0.211054
		Vehicle	-0.469359	-2.38999	-0.102676	0.620491	1.7633	-2.93953	-1.39766	1.8225	0.43573	0.55394	2.29249	-1.89349
Receptor	Assay
ItypOR29HsCO	Screening	Plate (biological replicate)	1	1	1	2	2	2	3	3	3	1	1	1	2	2	2	3	3	3
		Induction	No	No	No	No	No	No	No	No	No	Yes	Yes	Yes	Yes	Yes	Yes	Yes	Yes	Yes
		Compound	Response (% ∆ fluorescence)
		VUAA1	-1.00238	-1.63171	-0.65023	-1.62837	-1.39981	-1.64188	-1.23514	-0.12078	-0.18246	23.9509	20.5532	21.3686	23.5958	30.2476	19.1317	33.8056	33.9415	25.9647
		(+)-Isopinocamphone	0.462831	-0.55893	0.916936	-0.05983	-0.68408	0.132876	-0.59543	0.359261	1.0424	4.42898	3.57663	4.7935	4.52779	3.30446	3.0777	4.75866	5.41004	5.3648
		(−)-Isopinocamphone	1.37336	-1.23141	0.538003	-1.05629	0.275585	-1.37083	-0.4636	-0.08567	0.627581	4.03977	3.52376	1.34134	2.93122	3.08128	3.60787	3.7106	1.87537	4.43848
		(+)-Pinocamphone	-1.46332	-2.21302	-1.72265	-0.24946	0.699261	-0.56009	1.26568	1.86887	1.07841	2.67359	4.21225	1.31885	4.56225	4.67389	4.2767	5.21128	4.06371	5.13458
		(−)-Pinocamphone	-2.26081	-1.36717	-0.7381	-0.68472	-0.34878	-1.89769	0.809856	2.37137	1.51964	3.72496	4.30538	2.77786	1.49215	1.16222	1.60682	4.61897	5.03498	4.60266
		(−)-Pinocarvone	-1.82424	-0.81105	-1.89642	-0.54314	-0.53185	-1.46213	-2.06097	-0.99991	-0.90455	0.658786	1.14431	1.12975	0.731717	0.808825	2.48168	1.56442	2.18099	1.05732
		(±)-Camphor	2.06462	1.31757	-0.02354	1.56764	2.11614	2.33749	0.1972	-0.71088	0.363668	1.30141	1.42951	1.07976	4.31949	2.79897	1.10686	0.642613	-0.88303	1.62883
		(+)-trans-4-Thujanol	-0.51452	-1.24179	-2.33539	-0.58369	0.625813	-0.8869	-0.89288	-1.56228	-1.17943	-0.87263	-2.44722	-0.99995	-0.24282	-2.01281	-0.91407	-1.41491	-2.30602	-2.14048
		1,8-Cineole	0.410554	0.289493	0.712512	-0.0801	0.405961	-0.06874	0.709807	-0.58482	0.086755	-0.03623	-1.93681	1.34402	-0.81684	0.24407	-1.34864	0.715864	-1.29496	-0.0074
		(−)-Verbenone	-1.42829	-1.17235	-1.5726	-0.94964	-2.02257	-0.94424	1.2496	1.97904	1.65864	0.196582	-0.41582	-1.18783	-0.75823	-1.66967	-1.01938	0.720493	-0.04887	0.445471
		(−)-(4S)-cis-Verbenol	1.686	0.912703	0.865941	1.18189	2.46062	2.08453	2.01367	1.11671	0.464626	1.01752	0.590341	0.181591	2.18523	2.36821	1.37472	0.260686	0.334113	0.113797
		(−)-trans-Verbenol	-0.14459	-0.27223	-0.27806	-0.16074	0.967095	0	1.09338	1.9616	1.87396	1.22398	0.008538	-0.71308	0.935675	-0.52368	1.30148	0.137094	1.35492	1.72831
		(+)-trans-Verbenol	0.721541	0.486185	-1.10015	-0.25396	-0.03352	-0.26956	0.098717	0.669685	0.175372	-1.65813	-0.44487	-0.312	-0.15742	-2.13253	-0.71066	0.896212	1.25043	0.646856
		Amitinol	1.27294	0.737959	1.08228	1.06975	1.13949	0.636819	2.23539	1.64706	1.79359	1.2191	0.253996	0.595604	0.230857	1.60935	1.39016	0.349417	1.71475	1.77691
		E-myrcenol	-0.50575	-0.65202	-0.60622	3.61061	2.48961	2.45343	1.82306	3.10991	1.05903	-0.28786	-0.93494	-0.44051	2.33338	1.71733	4.02489	1.6427	1.4032	1.28014
		(±)-Ipsenol	0.054578	-0.72497	-0.27913	-0.66726	0.22215	0.410725	0.740334	0.248923	0.427244	-0.672	-1.00949	0.720769	-0.83898	0.993446	-0.73929	0.417794	0.361564	0.924952
		(±)-Ipsdienol	0.582586	-0.63144	-1.04383	0.636089	-0.03948	-0.01897	1.58203	0.307732	1.3054	0.181738	-0.95399	0.556041	-0.30779	-0.25812	0.936543	1.08254	1.12146	-0.18677
		2-Methyl-3-buten-2-ol	1.03784	0.612709	0.351902	0.262867	1.02473	0.037825	1.68525	0.118153	1.31938	1.05983	0.328519	0.925862	0.165824	-0.56422	1.40067	0.729398	0.883458	-0.15971
		Lanierone	0.134957	-0.13602	0.264506	-0.04421	-0.38589	1.01983	1.46086	0.72713	1.00807	-0.0416	-1.09208	1.09282	1.106	1.01876	-0.01331	1.5152	0.666048	1.07819
		(5S,7S)-trans-Conophthorin	0.738541	-1.28793	-0.84702	-1.01127	0.702	-1.27165	0.70131	-1.81399	-0.3059	-1.29365	-1.95926	-0.58343	-1.78159	-1.73782	-0.57837	-1.44429	1.32966	-0.63353
		(+)-3-Carene	1.03722	0.782783	0.478142	-0.07978	-0.56581	-1.34316	0.024373	1.77346	1.43505	2.56391	-0.47417	-0.02322	-0.56957	0.818812	-0.24657	0.263039	0.609399	1.1036
		Myrcene	1.15694	4.02106	1.1245	0.988121	0.371249	1.62449	1.78453	1.58417	0.570661	2.45127	0.457094	0.978731	1.35399	1.0825	1.05222	0.087395	0.861722	0.454902
		(+)-α-Pinene	-0.57993	1.03526	-1.34202	0.097187	-0.54496	1.29843	0.461836	0.39051	-0.47724	-0.39014	-1.1377	0.130689	-0.73991	-0.61515	2.42245	-1.3322	0.47175	-0.54147
		γ-Terpinene	-1.33705	-0.02502	-1.73803	0.147347	-0.07215	-0.69468	-0.5698	-0.08102	-1.24909	-0.79539	0.903887	-1.37996	0.868403	1.77981	-0.31997	-0.01124	-0.21995	0.059291
		p-Cymene	1.50397	0.693012	0.856682	0.483845	1.22651	1.19667	1.64278	0.465768	0.523958	1.60124	1.30762	1.14028	0.734801	1.21436	0.13309	1.75262	0.297619	0.454321
		Geranylacetone	2.31277	1.33851	2.40209	0.848707	1.54879	1.77674	2.13969	2.76432	1.90193	3.52102	2.29172	1.83944	-0.48374	-0.41919	1.21268	0.086023	1.21173	0.533034
		3,4-Dimethoxytoluene	3.15821	-0.7978	0.515938	1.51848	1.30879	0.507526	3.31947	2.86155	1.0994	1.36079	0.806478	0.982471	1.01833	1.86762	2.32757	0.892061	0.595008	0.792056
		Eugenol methyl ether	-0.2182	-1.26318	-2.5267	-0.26243	-1.6224	-1.55233	-1.34093	-1.69458	-1.78654	-2.06143	-1.89021	-2.35595	-3.29383	-0.76908	-0.35735	-1.8398	-2.66268	-2.27931
		Estragole	-1.59752	-2.24269	-0.21193	-0.52548	-1.13966	-0.89307	-0.92111	-1.43211	0.100413	-0.82893	0.131822	-0.88407	-1.36235	-1.15296	-0.58197	-1.1284	-0.77185	-1.18641
		4-Vinyl anisole	-0.03776	-1.79835	-0.52913	-0.65237	-1.25669	-1.2074	-1.75624	-1.39096	-2.72745	0.267229	-2.02877	-0.49467	-0.64879	-0.75445	-0.81117	-1.03772	-0.5699	-0.83787
		4-Ethylguaiacol	-1.27824	0.343043	-0.14482	0.307921	-0.9083	-0.24686	-0.37831	-0.46318	-0.75105	-0.51585	-0.95352	0.45446	-1.77989	-0.94477	-0.35905	-0.20748	-0.64465	-0.63456
		Acetophenone	0.920611	0.600258	0.876807	0.456613	0.287897	0.165822	0.107189	-0.18768	0.63325	1.22845	0.535357	0.955386	0.2327	0.260936	1.26911	0.734639	-0.31999	0.148602
		2-Phenylethanol	-0.20664	1.25728	0.284945	-1.35737	-1.56863	0.235431	-2.06999	-0.60118	-1.30624	-0.02889	0.302776	-0.42505	1.8165	-0.52164	0.67611	0.469311	-1.5451	0.054637
		Styrene	-0.55314	-1.03243	0.113941	-0.98479	-0.28291	-0.17663	-0.18108	-0.71677	0.178888	-1.68669	-0.6795	-0.52061	-1.539	-0.54972	-0.81562	-0.37005	0.066185	0.496937
		(±)-1-Octen-3-ol	-0.9993	-0.0544	-0.6876	-0.60212	-1.47425	-2.11013	-1.32303	0.554377	-0.18945	0.117516	-1.66981	-1.27034	-1.32338	-1.1783	-0.30203	-0.30154	0.047045	0.036647
		(±)-3-Octanol	-1.81534	-1.13825	-1.24552	-1.16034	-0.6259	-2.30463	-1.26959	-1.70474	-0.05755	-0.53249	-2.40764	-0.16602	0.466878	-0.0912	-0.74894	-0.09407	-1.07249	-0.11994
		1-Hexanol	-0.49227	-2.16049	-0.32945	-0.33099	-1.08607	-0.64816	0.157516	0.626821	-1.00796	0.194725	0.238444	0.604206	-1.43746	-0.62384	-1.02483	0.063835	0.316572	-0.18159
		Vehicle	-1.09614	-0.68627	-1.02799	-0.01957	0.012303	-0.14323	0.826947	0.998736	0.412019	0.110698	-0.48045	-1.16531	-2.96551	-0.71802	-0.02428	-0.32349	0.161238	-0.18792
Receptor	Assay
ItypOR29HsCO	Dose-response	Plate (biological replicate)	1	1	1	2	2	2	3	3	3	1	1	1	2	2	2	3	3	3
		Induction	No	No	No	No	No	No	No	No	No	Yes	Yes	Yes	Yes	Yes	Yes	Yes	Yes	Yes
	Compound	Concentration (M)	Response (% ∆ fluorescence)
	(+)-Isopinocamphone	0.00015	-0.32201	0.274367	0.783066	4.04523	2.08028	1.42023	3.84623	2.96522	2.17782	7.07196	7.52533	5.69142	7.30677	8.89083	7.68856	7.06916	6.51266	7.8214
		7.5e-05	1.71603	0.121633	0.434854	2.00943	2.66662	2.39745	1.4256	1.72584	1.7396	5.14975	6.13698	6.69677	6.54601	6.35353	7.20616	5.63223	6.82481	5.80857
		3.75e-05	-0.29293	-0.45652	-0.87727	1.21496	0.589936	0.741585	0.12659	0.969934	1.09627	3.88455	4.09104	3.78039	6.8772	5.38644	6.06777	4.9646	4.62089	4.79259
		1.88e-05	0.481498	0.449761	1.08123	2.39508	1.65506	2.32068	1.43831	0.690028	0.005573	2.87118	3.86272	5.01492	5.7674	5.27109	4.732	3.91813	5.73215	4.34971
		9.38e-06	-0.00391	-0.03431	0.947814	0.539703	0.728763	1.67231	0.923581	1.57403	-0.48533	2.43074	3.69988	3.88923	4.58663	3.57558	3.53219	3.46712	3.02881	4.13828
		4.69e-06	-0.30467	-0.68089	-1.25827	0.620712	0.107699	0.07079	1.14788	0.133143	-0.01343	1.34764	3.28781	2.24525	0.946225	1.34583	2.63667	2.54288	2.59122	1.75938
		2.34e-06	0.414455	0.837301	-1.43932	0.741806	-1.23479	-0.63573	-0.19535	0.289063	0.639232	1.33564	2.02222	1.71267	1.49219	0.960048	2.21038	1.56488	0.586812	1.29771
		1.17e-06	-0.36155	-0.90554	0.425766	-1.32387	1.03815	-0.06395	-0.18824	0.251507	0.01149	0.376869	1.17027	1.92182	0.489172	0.321851	0.352958	1.56149	0.965905	2.00255
		5.9e-07	0.509785	0.135819	-0.01227	0.73377	0.201813	0	-0.34324	0.903412	1.01575	0.144452	0.260192	0.449464	1.42701	1.13921	0.967504	0.170869	0.404782	1.45318
		2.9e-07	-1.72756	-1.30335	-1.35714	-1.71845	-0.53727	-2.22667	0.343615	-0.42065	0.285748	-0.43853	-0.24103	0.135301	-0.08431	-0.10691	-0.07886	-0.43288	0.138313	-0.02327
		1.46e-07	-0.22466	-0.48894	-0.58625	-0.50256	-0.58314	0.754631	0.950988	0.982544	0.699863	0.209283	1.13676	0.729525	0.142438	0.80698	0.495164	1.69523	-0.16008	-0.31031
	(-)-Isopinocamphone	0.00015	2.51485	3.50067	2.98386	2.00554	2.15916	1.1935	3.42737	3.69118	4.70059	5.9213	7.92629	6.52147	3.50221	5.9192	5.28942	5.68192	6.64768	5.85227
		7.5e-05	0.956783	0.583549	1.54371	1.74511	0.672595	1.25314	0.937957	1.21447	0.404538	6.12582	6.18005	5.15248	6.39349	3.54896	5.43278	4.97139	3.74881	4.00258
		3.75e-05	1.14274	2.45744	1.74314	2.99646	2.15397	1.85448	-0.91944	-0.22695	-0.61873	5.60946	5.11591	6.25391	3.894	6.16818	4.98058	2.27232	2.69514	3.35469
		1.88e-05	1.35781	-0.19127	-0.53962	-0.40982	-1.79745	1.27719	-0.42413	0.488491	-0.40376	4.28683	3.74798	2.77336	3.25446	2.86068	2.53251	1.83648	2.00157	2.63048
		9.38e-06	0.809841	0.218588	1.19893	1.19557	0.366426	0.25291	1.52765	-0.16743	0.548976	2.68111	3.3614	2.44906	1.95013	2.37512	2.01491	2.32214	2.04479	1.76462
		4.69e-06	0.557119	1.1494	1.16373	-0.06973	0.180832	-0.73981	-0.22527	-0.55256	-1.02206	1.93524	2.71775	3.09856	2.41944	0.409795	1.40272	1.19299	1.10681	0.596753
		2.34e-06	0.282481	-0.10999	-0.92944	-1.20629	-0.69046	-0.49417	-1.50695	-1.4108	-1.05681	1.55647	1.78101	2.22804	0.922888	2.63738	1.18933	1.04305	-0.2403	1.36435
		1.17e-06	0.317491	0.371624	0.644088	-1.38788	-1.30541	-0.13018	-0.20755	0.456209	-1.67006	1.31672	1.77051	1.7252	-0.04245	-0.04967	-0.48528	0.547777	-0.3938	1.18829
		5.9e-07	0.271978	0.325534	1.41099	-0.53336	-1.28029	-0.05976	-1.63876	-0.75388	-0.56318	1.55086	1.82478	1.33347	-0.65539	0.30839	0.508733	0.517361	0.411683	-0.1145
		2.9e-07	1.3646	-0.38753	-0.71301	-1.55181	-1.36438	-2.2052	-1.73245	-1.36828	-0.60844	0.301086	-0.24085	-1.59669	-1.20822	-1.62015	-0.36315	-0.88915	-2.04822	-0.93656
		1.46e-07	1.78859	1.38703	1.83428	0.781421	-0.38716	0.922139	-0.99315	-0.19171	-1.88649	0.53814	0.61795	0.78267	0.056812	1.37876	1.47177	-1.19491	-0.35825	-0.61885
	(+)-Pinocamphone	0.00015	2.74668	4.06463	2.72093	3.82169	3.14714	2.37125	2.50881	2.09034	3.8493	3.71291	6.95268	6.91446	5.70456	7.26082	7.17231	3.86434	6.57718	5.73262
		7.5e-05	1.22887	1.77653	1.35242	0.736029	1.70808	1.68257	1.12198	1.95127	1.90448	6.61728	4.74751	5.385	5.77084	5.71872	7.18303	5.15308	6.5342	5.72717
		3.75e-05	-0.80197	-0.93909	-0.16368	-0.34796	-0.34877	-0.31203	-0.32881	-0.1413	1.1499	4.69996	3.12044	3.38521	4.30615	4.57789	4.70467	4.32207	4.84544	4.86378
		1.88e-05	0.48695	0.483571	-0.93224	0.619839	1.5605	0.69751	0.100358	0.395947	0.116339	3.1678	4.02325	5.13989	4.93654	3.33035	5.27871	4.08258	4.47776	2.95429
		9.38e-06	0.541108	-0.22313	0.4257	0.216839	-0.19523	0.378687	1.2	0.444896	0.439894	1.91019	2.29292	2.56872	2.1593	2.4345	3.9859	2.45402	3.10801	3.22985
		4.69e-06	-0.30284	-0.50952	-0.72615	0.47549	2.38022	0.630647	-0.58156	0.289023	-0.25627	1.36625	1.32074	2.58751	3.33824	3.29931	3.76372	1.18463	1.28576	1.36336
		2.34e-06	-1.00645	-1.17102	-0.23418	-0.78648	1.11876	0.2968	0.383941	0.97418	0.467681	1.83701	1.29059	2.2711	0.644363	0.677133	2.56676	2.52471	1.14487	1.95152
		1.17e-06	-0.47934	-0.92424	0.668614	0.471495	-0.2577	0.616914	-0.32128	0.068368	1.36303	0.67148	0.359647	-0.65307	0.71877	0.128617	-0.05749	0.978804	0.696379	2.10021
		5.9e-07	-0.5341	-0.44707	-0.44569	-0.66426	2.48166	-0.48415	1.27272	-0.61669	-0.10814	1.13372	-0.46113	1.51703	1.9657	1.23613	0.804791	-0.00528	0.75132	0.757521
		2.9e-07	-1.35666	-1.43147	0.013222	0.127243	-0.23027	0.235393	-0.11172	0.338348	-0.82222	0.076441	-0.32302	-0.80019	-0.06419	0.438297	-0.37209	0.813678	1.39	0.222389
		1.46e-07	-0.10631	-0.53338	0.796936	0.549592	1.82599	1.17322	0.261745	1.39648	-0.17294	-0.02233	1.98638	-0.19382	1.18972	0.603609	0.540214	0.818786	0.123411	1.71617
	(-)-Pinocamphone	0.00015	1.49077	1.84728	0.466421	4.25156	5.5623	4.06008	4.05198	4.66949	3.8486	4.62237	5.43499	5.01081	4.8366	5.19931	5.61169	4.59005	4.44074	4.33793
		7.5e-05	1.41304	1.28596	2.03171	1.32787	0.907604	0.666914	1.65164	1.08705	1.19815	4.93111	4.98271	4.78564	4.86824	3.5033	3.34801	3.3289	3.68229	5.25086
		3.75e-05	-0.07703	0.097975	0.169716	-1.29018	-2.34753	-0.24136	0.369932	-0.65416	0.300904	3.66966	3.92515	2.42769	1.8551	2.75577	2.46908	2.08125	2.68665	1.34996
		1.88e-05	0.515683	-0.6564	-0.12767	-1.22689	0.36547	1.42721	0.321177	-0.5107	0.483142	1.8822	3.94861	3.56195	2.80143	2.18995	1.99236	0.761977	2.53939	2.80379
		9.38e-06	0.1657	0.300971	1.37025	0.054282	-0.30151	-1.37977	-0.71388	0.423201	1.06425	1.60522	2.27242	3.04834	2.02412	1.9541	2.07183	1.82228	1.89061	1.83753
		4.69e-06	1.06207	0.425443	-0.10059	1.37696	0.277618	-0.12994	0.307957	0.993261	1.19258	1.18055	-0.61525	0.73851	3.78879	0.475426	1.53148	1.69598	-0.40829	0.37145
		2.34e-06	-1.30731	-0.44082	1.08167	-0.18333	-0.62629	0.284077	0.396407	-0.34221	-0.18388	0.116908	1.99077	0.525492	0.300234	0.818221	-0.21268	2.43999	0.244654	1.36977
		1.17e-06	0.64456	1.64764	0.887288	-0.5433	-0.87269	-1.80053	-0.2871	0.254752	-0.97386	1.2511	0.070115	1.75941	0.169227	1.08036	0.383607	0.658377	0.554715	0.829522
		5.9e-07	0.360879	0.040302	0.216903	-0.66101	0.028246	-0.45176	0.047034	-0.39016	0.79701	1.1027	0.665663	0.196558	-0.92206	-0.67366	-0.28723	-0.05433	0.244503	0.328654
		2.9e-07	0.007433	-0.44272	0.822635	-0.7633	-1.34205	0.436498	-0.26341	0.336874	-1.13987	0.148725	0.886178	-0.12389	-0.68296	-0.62684	-1.66971	-0.41498	0.393587	-1.1605
		1.46e-07	-0.14339	-0.15119	-0.68181	0.642364	-0.96237	-0.17327	-0.97925	0.040253	1.00383	0.946966	1.65491	0.247034	0.817972	-0.12087	-0.56717	0.108416	0.894573	1.00661
